# Supplementary material for: Synthesis and biological evaluation of vioprolide B and its dehydrobutyrine-glycine analogue
Source: Royal Society of Chemistry journal article supplement (doi:10.1039/d4cc02946a), 2024-01-01
Supplement: d4cc02946a1.pdf [file d4cc02946a1.pdf]

## Electronic Supplementary Information (ESI)

### Synthesis and Biological Evaluation of Vioprolide B and its Dehydrobutyrine-Glycine Analogue

Noé Osorio Reineke,<sup>a</sup> Franziska A. V. Elsen,<sup>b</sup> Hanusch A. Grab,<sup>a</sup> Dietrich Mostert,<sup>b</sup> Stephan A. Sieber<sup>b</sup> and Thorsten Bach<sup>\*a</sup>

<sup>a</sup> Technische Universität München, School of Natural Sciences, Department of Chemistry and Catalysis Research Center, Lichtenbergstraße 4, 85747 Garching, Germany

<sup>b</sup> Technische Universität München, School of Natural Sciences, Department of Bioscience and Center for Functional Protein Assemblies, Ernst-Otto-Fischer-Straße 8, 85747 Garching, Germany.

### Content:

|   |                                                                                                              |    |
|---|--------------------------------------------------------------------------------------------------------------|----|
| 1 | Supplementary Figures.....                                                                                   | 2  |
| 2 | Biochemical Methods.....                                                                                     | 3  |
| 3 | Isotopically Labelled Desthiobiotin Azide (isoDTB)- Activity-Based Protein Profiling (ABPP) experiments..... | 5  |
| 4 | Equipment and general synthetic methods.....                                                                 | 10 |
| 5 | Synthetic procedures and NMR spectra .....                                                                   | 11 |
| 6 | Comparison of the NMR spectra.....                                                                           | 47 |
| 7 | Data Availability.....                                                                                       | 50 |
| 8 | References .....                                                                                             | 51 |

# 1 Supplementary Figures

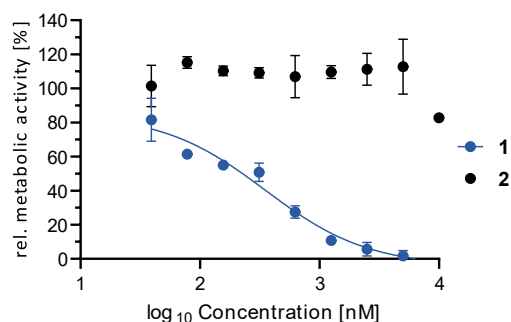

**Figure S1:** Dose-dependent inhibition of HeLa cell proliferation by compounds **1** (Vioprolide B) and **2** (Dhb-Gly analogue).  $IC_{50}$  is determined by MTT assay with 72 h treatment and calculated as 351 nM (78-527 nM 95% confidence interval) for **1** and  $> 10 \mu\text{M}$  for **2**. Data points result from four biologically independent experiments performed in three technical replicates.

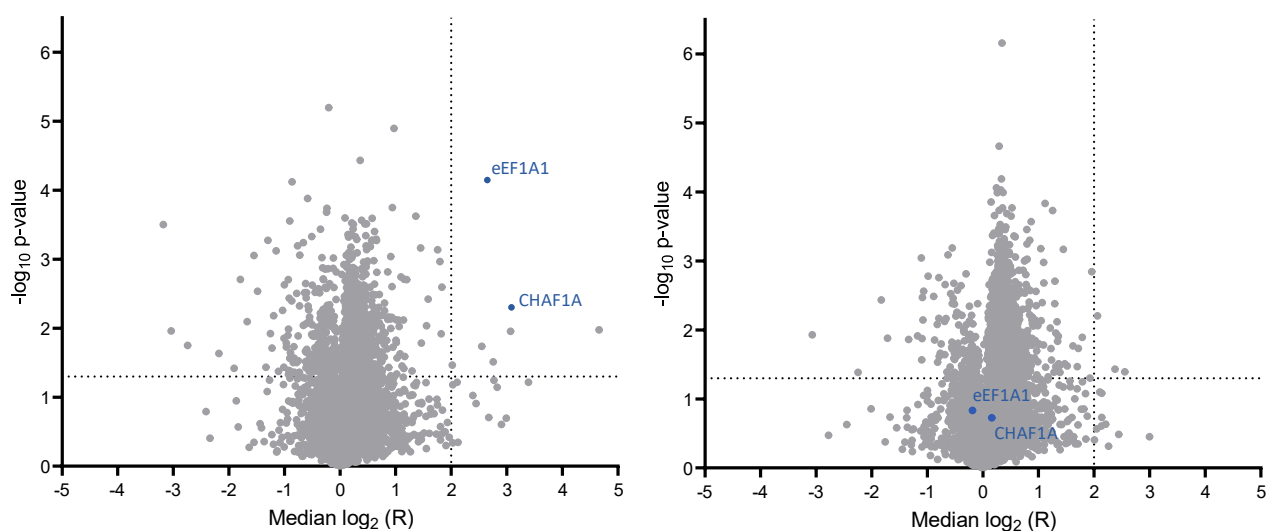

**Figure S2:** Volcano plots of the competitive isotopically labelled desthiobiotin azide (isoDTB)- activity-based protein profiling (ABPP). In brief, identical sample sets of Jurkat cells were treated *in situ* with compound **1** (shown in **A**) or compound **2** (shown in **B**) respective DMSO as control, lysed, incubated with cysteine-reactive iodoacetamide alkyne (IAA) and clicked to isotopically labelled light (compound-treated) respective heavy tags (DMSO-treated). Samples are combined (in **A**: treatment with **1** and DMSO, in **B**: treatment with **2** and DMSO), enriched, digested with trypsin, eluted from streptavidin beads and quantified by LC-MS/MS. The difference in MS1 signal intensity between heavy (compound-treated, control) and light (DMSO-treated) labelled peptides is represented by the competition ratio  $R$ . The volcano plots represent the median  $\log_2(R)$  and the significance ( $-\log_{10}(p)$ ) obtained by a one-sample t-test) for all quantified cysteines. All data result from at least three biologically independent replicates.

## 2 Biochemical Methods

### Cell culture

Jurkat cells were cultured in RPMI 1640 (*Sigma*) containing 10% (v/v) fetal bovine serum (FBS) (*Sigma*), pyruvate and L-glutamine (2 mM final concentration). HeLa cells were grown in Dulbecco's Modified Eagle Medium (DMEM high glucose, 4.5 g/L; *Sigma*), supplemented with 10% (v/v) FBS and L-glutamine (2 mM final concentration). HeLa cells were detached with Accutase (*Thermo Fisher Scientific*). Cell numbers were determined by mixing cell suspension with trypan blue [1:1 (v/v)], followed by counting living cells in a *Neubauer*-improved cell counting chamber. All cells were incubated at 37°C with 5% CO<sub>2</sub> at constant humidity. Pre-warmed sterile phosphate-buffered saline (PBS, 136.9 mM NaCl, 10.1 mM Na<sub>2</sub>HPO<sub>4</sub>, 2.7 mM KCl, 1.8 mM KH<sub>2</sub>PO<sub>4</sub> in ddH<sub>2</sub>O, pH 7.4) was used to wash cells between passages.

### MTT cytotoxicity assays

HeLa cells were seeded at a density of 4000 cells per well (200 µL) in a transparent, flat-bottomed 96-well plate (*Thermo Fisher Scientific*). Cells were grown overnight in a humidified atmosphere at 37 °C and 5% CO<sub>2</sub> to allow the cells to adhere to the surface. Subsequently, the medium was aspirated and replaced by fresh medium supplemented with compound in concentrations ranging from 39 nM to 10 µM or 0.1% DMSO as a control. The cells were incubated at 37 °C, 5% CO<sub>2</sub> for 72 h. For the determination of metabolic activity, 20 µL 3-(4,5-dimethyl-2-thiazolyl)-2,5-diphenyl-2H-tetrazolium bromide solution (MTT, 5mg/mL in PBS, *Sigma*) was added to each well, and the cells were incubated at 37 °C, 5% CO<sub>2</sub> for 3 h. Thereafter, the medium was aspirated, and the violet formazan crystals were dissolved in 200 µL DMSO per well under shaking (300 r.p.m., 25 min).

Jurkat cell suspension was seeded (16,000 cells/well in 50 µL) in 96-well plates (transparent Nunc round-bottomed, *Thermo Fisher Scientific*). Compound (50 µL/well, 0.1% final DMSO concentration) in varying concentrations or DMSO respectively was added in RPMI-1640 medium containing 10% (v/v) FBS in triplicates and cells incubated (37°C, 5% CO<sub>2</sub>, 48 h). Subsequently, cells were supplemented with 3-(4,5-dimethyl-2-thiazolyl)-2,5-diphenyl-2H-tetrazolium bromide solution (MTT) (20 µL/well, 5 mg/mL in PBS, *Sigma*) and incubated (37°C, 5% CO<sub>2</sub>, 2 h). For cell lysis, triplex lysis buffer (50 µL, 10% (w/v) SDS, 0.012 M HCl,

2% (v/v) isobutanol) was added to each well, pipetted up and down and incubated (37°C, 5% CO<sub>2</sub>, o.n.).

The absorbance was measured at 570 nm for both cell lines with a reference wavelength of 630 nm using an Infinite F200 pro plate reader (*Tecan*). Four biological replicates, each consisting of three technical replicates, were measured for each data point. Cell viability was normalised with respect to the DMSO control and fitted as log(inhibitor) vs. response variable slope (four parameters) non-linear regression using *GraphPad Prism* 10.01. Cytotoxicity is reported as the IC<sub>50</sub> value, the concentration at which 50% viability is reached.

### 3 Isotopically Labelled Desthiobiotin Azide (isoDTB)- Activity-Based Protein Profiling (ABPP) experiments

The experiment was performed according to a modified literature procedure.<sup>1,2</sup> IsoDTB tags were synthesised as previously described.<sup>2</sup>

#### *Labelling, Lysis and Click Reaction of Jurkat Cells*

For labelling experiments,  $6 \times 10^6$  Jurkat cells were resuspended in 2 mL RPMI medium (without additives) and treated with Vioprolide B (**1**), Vioprolide Dhb-Gly analogue (**2**), or DMSO (10  $\mu$ M final compound concentration, 1% final DMSO concentration). After incubation (37 °C, 5% CO<sub>2</sub>, 1 h), cells were centrifuged (500  $\times$  g, 5 min), medium was aspirated, cells were washed with PBS (1  $\times$  2 mL), and incubated (r. t., 5 min) with pre-cooled lysis buffer (300  $\mu$ L with 1% NP-40, 1% sodium deoxycholate in 0.1% sodium dodecyl sulfate (SDS) in PBS). After lysis by sonication (5 cycles, 10 s, 50% intensity, Sonopuls HD 2070 ultrasonic rod, *Bandelin electronic GmbH*) with cooling breaks on ice, lysates were clarified by centrifugation (700  $\times$  g, 4 °C, 30 min) and supernatants were transferred into fresh tubes. Protein concentration was determined using the ROTI Quant universal Kit (*Carl Roth*) and adjusted to 200  $\mu$ g proteome in lysis buffer (200  $\mu$ L final volume). Standardised lysates were incubated (room temperature (r. t.), 1 h) with iodoacetamide alkyne (IAA, 4  $\mu$ L, 50 mM stock) before being subjected to the copper-catalyzed azide-alkyne cycloaddition (CuAAC) reaction. 28  $\mu$ L click master mix [4  $\mu$ L TCEP (tris(2-carboxyethyl)phosphine) (52 mM, dd H<sub>2</sub>O stock), 12  $\mu$ L Tris(benzyltriazolylmethyl)amine (TBTA) (1.7 mM, 4:1 tBuOH:DMSO stock), 4  $\mu$ L CuSO<sub>4</sub> (50 mM, dd H<sub>2</sub>O stock), 4  $\mu$ L light or heavy isoDTB-azide (50 mM), 4  $\mu$ L 10% SDS in PBS] were added and incubated (r. t., 1 h) in the dark. DNAase I (1  $\mu$ L, *Roche*, 04716728001) was added, and the samples were incubated (37 °C, 30 min).

#### *Mass spectrometry (MS) Sample Preparation*

Heavy and light tagged samples were combined (1:1) and subsequently incubated (r.t., 1,000 rpm, 5 min) with magnetic beads (SpeedBead magnetic carboxylate, *Cytiva*, 651 521 050 502 50, 20  $\mu$ L and 451 521 050 502 50, 20  $\mu$ L) before ethanol (400  $\mu$ L) was added. The samples were incubated again (r.t., 1,000 rpm, 5 min). Samples were placed on a magnetic rack, supernatants were removed, beads were washed with 80% ethanol in water (3  $\times$  400  $\mu$ L), and subsequently resuspended in urea (2 M in 0.5% SDS in PBS). Samples were reduced with

dithiothreitol (200 mM in water, 10  $\mu$ L), incubated (65  $^{\circ}$ C, 15 min), alkylated with iodoacetamide (384 mM in water, 10  $\mu$ L), and incubated (37  $^{\circ}$ C, 1,000 rpm, 30 min). After the addition of ethanol (400  $\mu$ L) and followed incubation (r. t., 1,000 rpm, 5 min), samples were placed on a magnetic rack, supernatants were removed, beads were washed with 80% ethanol in water (3  $\times$  400  $\mu$ L) and resuspended in urea (2 M in 0.5% SDS in PBS). Protein digestion was conducted using trypsin incubation (2  $\mu$ g, *Promega*, V511C, 37  $^{\circ}$ C, 200 rpm, overnight).

The next day, the supernatants were transferred into fresh tubes and peptide elution from the beads was conducted with two-fold incubation (37 $^{\circ}$ C, 1,000 rpm, 30 min) with DMSO (2% in water, 50  $\mu$ L). Supernatants were pooled, pre-washed (PBS) streptavidin agarose beads (*Thermo Scientific*, 10733315, 50  $\mu$ L beads in 1.2 mL PBS) were added, and the suspension was incubated (r. t., 1 h, continuous rotation). Samples were centrifuged (1,000  $\times$  g, 3 min), supernatants were removed by aspiration, and beads were resuspended in PBS (600  $\mu$ L). Samples were transferred onto centrifuge columns (*Thermo Scientific*, 11894131) and washed over several steps (2  $\times$  600  $\mu$ L PBS, 3  $\times$  600  $\mu$ L water, 3  $\times$  600  $\mu$ L 50% acetonitrile (MeCN) in water). Peptides were eluted with 0.1% trifluoroacetic acid (TFA) in 50% MeCN in water (1  $\times$  200  $\mu$ L, then 2  $\times$  70  $\mu$ L) and completed by centrifugation (3,000  $\times$  g, 3 min). The solvent was removed with a rotating vacuum concentrator (45  $^{\circ}$ C). Peptides were dissolved in 0.1% TFA in water (30  $\mu$ L) under sonication (3 min) and filtered through pre-equilibrated (0.1 % TFA in water) centrifugal filters (*Merck*, UFC30GVNB) at (17,000  $\times$  g, 2 min).

#### *Sample Analysis by LC-MS/MS*

Peptide quantification was performed using an HPLC-MS/MS system consisting of a Vanquish Neo UHPLC (*Thermo Fisher Scientific*) coupled to an Orbitrap Eclipse Tribrid instrument (*Thermo Fisher Scientific*). The Vanquish Neo UHPLC was equipped with a PepMap<sup>TM</sup> Neo 5  $\mu$ m C18 300  $\mu$ m  $\times$  5 mm Trap Cartridge (*Thermo Fisher Scientific*) and operated in a Trap-and-Elute-Injection mode whereby the samples were loaded to the cartridge before the separation started with a flow rate of 400 nL/min using buffer A (0.1% formic acid (FA) in water) and buffer B (0.1% FA in acetonitrile). Peptide separation is achieved using an Aurora Ultimate<sup>TM</sup> separation column (3rd generation, 25 cm, nanoflow UHPLC compatible, *ionoptics*) at 40  $^{\circ}$ C coupled to a Nanospray Flex Ion Source (*Thermo Fisher Scientific*). The HPLC method comprises 75 min and starts with a gradient from 5% to 40% buffer B over a period of 60 min, followed by a second gradient up to 60% buffer B within 5 min and an isocratic period of 10 min at 90% buffer B. Separation column washing and equilibration are conducted with enabled fast equilibration, equilibration factor “3” at 5% buffer B. Trap column washing and equilibration

are conducted with enabled fast wash and equilibration together with zebra wash (2 wash cycles, automatic equilibration factor). The Orbitrap Eclipse mass spectrometer was run with an internal real-time mass calibration using user-defined lock mass (positive,  $m/z = 445.12003$ ) and operated in data-dependent acquisition mode. The full MS scans were collected in the orbitrap at a resolution of 120,000 and an AGC target of  $4e5$  with automated maximum injection time in a scan range of 300-1500  $m/z$ . For MS2 scans, the TOP10 intense ions with a charge state of 2-7 were selected with a minimum intensity threshold of  $5e3$  and enabled isotope exclusion and dynamic exclusion for 30 s whereby peaks with charge state 1 or unassigned charge state were excluded. MS2 spectra were collected at a resolution of 15,000 and an AGC target of  $5e4$  with automated maximum injection time. Isolation in the quadrupole was conducted using a window of 1.6  $m/z$ . Higher-energy collision-induced dissociation (HCD) with normalised collision energy of 30% was used to generate the fragments which were detected in the orbitrap. Data acquisition was performed using *Thermo Scientific* Foundation software version 3.1sp9 and Xcalibur version 4.6.

### *Data Analysis*

Acquired raw files were converted into mzML format using the MSConvert tool (version: 3.0.21193-ccb3e0136) of the ProteoWizard software<sup>3</sup> (version: 3.0.21193 64bit). Standard settings were used with vendor's peak picking enabled. Further analysis was performed with FragPipe interface (version: 20.0) with MSFragger (version 3.8)<sup>4-10</sup>, Philosopher (version: 5.0.0)<sup>11</sup>, IonQuant (version 1.9.8)<sup>12</sup> and Python (version 3.7.3). Every experiment (Scheme 3B, Figure S2A, Figure S2B) was analysed in a different run. The global settings were set to "0"(=auto) RAM and "4" for parallelism. A "closed search" was conducted with the following settings: The FASTA database for homo sapiens (proteome identifier UP0 000 056 40) was downloaded on the 9<sup>th</sup> of February 2023 from uniprot.org<sup>13</sup> whereas reverse sequences were added manually. The precursor mass tolerance was set from "-20" to "20" ppm, with a fragment mass tolerance of "20" ppm. The calibration and optimisation were set to "mass calibration and parameter optimisation" and the isotope error to "0/1/2". For protein digestion, an "enzymatic" cleavage was entered with enabled clip N-term and "trypsin" as enzyme name and the trypsin cleavage rules (cut after "KR", but no cleavage after "P" and "1" missing cleavage, sense "C"). Peptide length was given with 6 to 50 in a peptide mass range of 500-5,000 Da. Variable modifications were given with a maximum of "3" per peptide and a maximum of "5,000" combinations and all modifications were enabled in the first search. The following settings were used as mass delta at the respective site: 15.9949 (M), 42.0106 ([^), 561.3387 (C), 567.3462

(C). The fixed modification is enabled for all amino acids with 0.0, except for cysteine (57.02146). Mass offsets and labile modifications were disabled and all other settings for MSFragger were kept as default. Run validation tools were activated and Cristal-C was disabled. The following settings for Rescoring using deep learning prediction were chosen: MSBooster, prediction of RT and spectra prediction was enabled whereas correlated features were not activated. PSM validation was set to percolator with a min probability of “0.5” and “-only psms --no terminate --post-processing-tdc” as command line options. ProteinProphet was enabled with “--maxppmdiff 2000000” and FDR filter and reports are activated to generate reports using “--sequential --prot 0.01” as filter. Other settings for the FDR filter, PTM-Shepherd and O-Pair were disabled. For MS1Quantification, Run MS1 quant, IonQuant and MaxLFQ were enabled with MaxLFQ min ions set to “2”. The masses for labelling were given with C561.3387 for light and C567.3462 for heavy. Re-quantification was activated, match between runs (MBR) and intensity normalisation across the runs were not enabled. Feature detection and peak tracing were conducted with min. scans of “3” and a min. isotopes of “2”, using a tolerance of 10 ppm for m/z, 0.4 min for RT and 0.05 1/kD for IM. The other settings for MS1 quantification were kept as default. Run TMT- Integrator for isobaric labelling-based Quantification and spectral library generation was disabled.

For downstream data analysis, the “ion\_label\_quant.tsv” files of the individual replicates were analysed separately. The “Modified peptide” was generated as either the “Light Modified Peptide” or the “Heavy Modified Peptide” based on the entry with the higher Intensity, for each entry. The masses of probe modification in the “Modified Peptide” were replaced by an “\*” and the mass of carbamidomethylation ([57.0215]) in this entry was deleted, if present. The full protein sequence was linked into the table. Based on this information, all peptide sequences that do not occur exactly once in the protein were excluded and the residue number of the modified residue was determined. The “identifier” was generated in the format “UniProtCode”\_C\_”residue number”, where C is the one letter code of the modified amino acid cysteine. For each “identifier”, the median “Log2 ratio HL”, which is the log2 transformed ratio of the heavy and light channels, was determined as median of the “Log2 ratio HL” column of all corresponding ions and renamed “Log2R\_replicate name”. If several different “Modified peptides” were detected for the same “Identifier”, the “Modified Peptide” with the shortest sequence was kept. For all identifiers, the data for all replicates was now combined into one table. If different “Modified peptides” were detected for the same “Identifier” in the different replicates, the “Modified Peptide” with the shortest sequence was kept. The average of the Log2R values of the individual replicates was calculated and named “Log2R\_Average” and



only kept, if it was quantified in at least 2 out of 4 replicates. Biological replicates which showed dominantly no content (NaN) were considered to be empty due to handling error and excluded for further evaluation.

Statistical analysis was performed according to a published procedure<sup>2</sup> using the Perseus<sup>14</sup> software (version 1.6.80). The data for each replicate of the same condition were loaded into Perseus before the rows were filtered based on at least two valid values. A two-sided one-sample t-test was conducted against a value of  $\log_2(R) = 0$ . The median values of  $\log_2(R)$  and  $-\log_{10}(p)$  derived from Perseus were used for the visualisation in a volcano plot. Proteins were called a “hit” if the median ratio  $\log_2(R)$  was above 2 and the statistical significance  $p$  was smaller than 0.05. The UniProt<sup>13</sup> identifier is linked to the data based on peptide sequence.

## 4 Equipment and general synthetic methods

All reactions sensitive to air or moisture were conducted in flame-dried glassware under a positive pressure of argon using standard Schlenk techniques. Dry tetrahydrofuran (THF) and dichloromethane (CH<sub>2</sub>Cl<sub>2</sub>) were obtained from an *M. Braun* MB-SPS 800 solvent purification system. Other dry solvents were acquired in the highest purity available and used without further purification.

Flash **chromatography** was conducted on silica 60 (*Merck*, Grain size: 40-63 μm, Pore size: 60 Å) using the specified eluent mixtures. For automated flash chromatography, a *Büchi* C-815 Flashmaster with pre-packed *Biotage* columns (*Biotage* Sfar Silica D Duo 60 μm; size as specified in protocol) was employed. Thin layer chromatography (TLC) was performed on silica-coated glass plates (*Merck*, silica 60 F<sub>254</sub>) with detection by UV ( $\lambda = 254$  and 366 nm) or by staining with a potassium permanganate (KMnO<sub>4</sub>) or ninhydrin (Nin) solution followed by heat treatment.

**IR** spectra were recorded on a Perkin Elmer Frontier FT/IR (ATR), with signal intensities designated as s (strong), m (medium), w (weak).

**<sup>1</sup>H- and <sup>13</sup>C-NMR** spectra were recorded on a *Bruker* AVHD-400, AVHD-500, or an AVHD-500cr spectrometer. Deuterated chloroform, MeOH, and DMSO were obtained from *Deutero* and used as solvents. The specific residual proton signal served as internal standard for spectrum calibration. Apparent multiplets resulting from accidental equality of coupling constants to those of magnetically non-equivalent protons are denoted as virtual (*virt.*). The relative configuration of products and the multiplicity of the <sup>13</sup>C-NMR signals were determined by two-dimensional NMR spectra (COSY, HSQC, HMBC, NOESY). If relevant, the ratio of the rotamers is specified, and the distinguishable signals are labeled (R1, R2). If the signals of a pair of rotamers overlap, the labeling is omitted. The determination of specific optical rotation values was carried out using an ADP440+ polarimeter (*Bellingham+Stanley*) at room temperature and a wavelength of 589 nm (Na-D-line).

**High-resolution mass spectroscopy** (HRMS) was performed on a *Thermo Fischer Scientific* LTQ Orbitrap XL (ESI).

A Melting Point M-565 instrument from *Büchi* was used for the determination of **melting points**.

## 5 Synthetic procedures and NMR spectra

### *N*-Boc-L-Pip-L-Thr-(*N*-Me)L-Val-L-Gls(*O*-TBS)-*O*-Me (**5**)

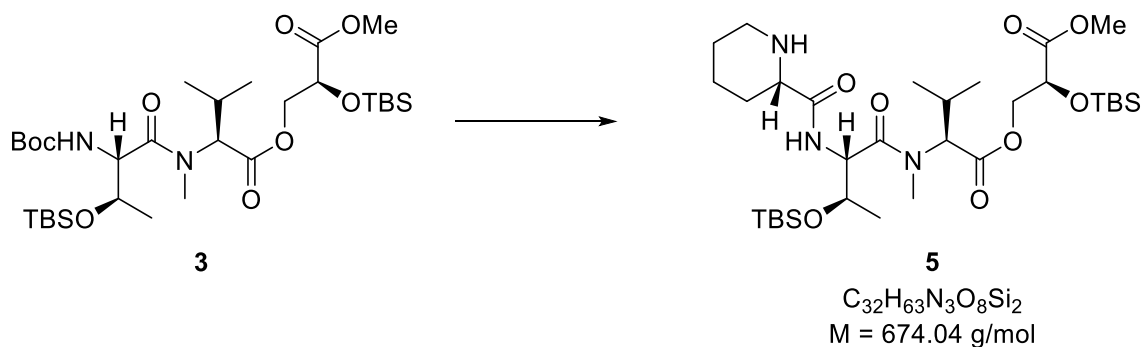

#### Boc-Deprotection:

A solution of peptolide **3** (500 mg, 754  $\mu$ mol, 1.00 equiv.) in  $CH_2Cl_2$  (2.6 mL) cooled to 0 °C is added dropwise with TFA (0.65 mL). After stirring for three hours at this temperature,  $CH_2Cl_2$  (15 mL) is added, and the solvent is removed under reduced pressure at room temperature. The resulting crude product is dried by azeotropic distillation (PhMe, 2  $\times$  15 mL) and used in the following reaction without further purification

#### Peptide coupling:

Boc-L-Pip (303 mg, 1.32 mmol, 1.75 equiv.) and HOAt (185 mg, 1.36 mmol, 1.80 equiv.) are dissolved in  $CH_2Cl_2$  (2.5 mL) and added at 0 °C to EDC·HCl (260 mg, 1.36 mmol, 1.80 equiv.) and DIPEA (128  $\mu$ L, 97.5 mg, 754  $\mu$ mol, 1.00 equiv.). Subsequently, the crude product of the deprotected peptoid is dissolved in  $CH_2Cl_2$  (6.6 mL) and slowly added dropwise to the reaction mixture. After the reaction is stirred and warmed to room temperature over 16 hours, it is quenched by the addition of water (10 mL) and  $CH_2Cl_2$  (30 mL). The phases are separated, and the organic phase is washed with 10% citric acid (20 mL),  $NaHCO_3$  (20 mL), and NaCl solution (15 mL). Then, the organic phase is dried over  $Na_2SO_4$  and filtered, before the solvent is removed under reduced pressure. After the crude product is purified by column chromatography (silica gel:  $\varnothing$  3 cm,  $\uparrow$  20 cm, n-pentane/EtOAc = 6/1  $\rightarrow$  5/1  $\rightarrow$  4/1), peptolide **4** (312 mg, 404  $\mu$ mol, 54% over 2 steps) is obtained as a yellow oil.

### Boc-Deprotection:

To a solution of the peptolide **4** (3.07 g, 3.97 mmol, 1.00 equiv.) in CH<sub>2</sub>Cl<sub>2</sub> (70 mL) at 0 °C, 2,6-lutidine (6.91 mL, 6.37 g, 59.5 mmol, 15.0 equiv.) and TMSOTf (7.88 mL, 9.70 g, 43.6 mmol, 11.0 equiv.) are added dropwise successively, and the reaction mixture is stirred at this temperature for seven hours. After this time, the reaction is quenched by the addition of NaHCO<sub>3</sub> solution (100 mL) and the phases are separated. The aqueous phase is extracted with EtOAc (3 × 50 mL), and the combined organic phases are dried over Na<sub>2</sub>SO<sub>4</sub> and filtered. The solvent is removed under reduced pressure, and the residue is purified by column chromatography (silica gel: Ø 5 cm, ↑ 20 cm, CH<sub>2</sub>Cl<sub>2</sub>/MeOH = 100/1 → 50/1 → 25/1). The Amine **5** (2.38 g, 3.52 mmol, 89%) is obtained as a colorless oil

**TLC:**  $R_f = 0.15$  (CH<sub>2</sub>Cl<sub>2</sub>/MeOH = 20/1) [KMnO<sub>4</sub>, Nin: purple].

**Rotamer ratio:** R1/R2 ≈ 95/5.

**<sup>1</sup>H-NMR** (500 MHz, CDCl<sub>3</sub>, 298 K):  $\delta$  (ppm) = 7.41 (d,  $^3J = 7.8$  Hz, 1H, Pip NH), 6.95 (d,  $^3J = 7.6$  Hz, 1H, Thr NH), 4.92 (d,  $^3J = 10.2$  Hz, 1H, Val NMeCH R1), 4.78 (dd,  $^3J = 9.2$  Hz,  $^3J = 3.2$  Hz, 1H, Thr CHNH R2), 4.74 (dd,  $^3J = 7.9$  Hz,  $^3J = 4.1$  Hz, 1H, Thr CHNH R1), 4.53 (dd,  $^3J = 11.1$  Hz,  $^3J = 4.5$  Hz, 1H, Glc CHH R1), 4.46 – 4.43 (m, 1H, Glc CHH R2) 4.39 (*virt. t*,  $^3J \approx ^3J = 4.6$  Hz, 1H, Glc CH), 4.30 – 4.16 (m, 3H, Val NMeCH R2, Thr CHCH<sub>3</sub> R2, Glc CHH R2), 4.13 – 4.06 (m, 2H, Glc CHH R1, Thr CHCH<sub>3</sub> R1), 3.74 (s, 3H, CO<sub>2</sub>CH<sub>3</sub>), 3.26 (dd,  $^3J = 9.9$  Hz,  $^3J = 3.3$  Hz, 1H, Pip CH), 3.14 (s, 3H, Val NCH<sub>3</sub> R1), 3.06 (*virt. dt*,  $^2J = 12.1$  Hz,  $^3J \approx ^3J = 4.0$  Hz, 1H, Pip NCHH), 2.88 (s, 3H, NCH<sub>3</sub> R2), 2.72 – 2.67 (m, 1H, Pip NCHH), 2.34 – 2.23 [m, 1H, CH(CH<sub>3</sub>)<sub>2</sub>], 2.17 [*virt. dsept*,  $^3J = 10.2$  Hz,  $^3J \approx ^3J = 6.6$  Hz, 1H, CH(CH<sub>3</sub>)<sub>2</sub>], 2.00 – 1.90 (m, 1H, Pip CHCHH), 1.82 – 1.72 (m, 1H, Pip CHCH<sub>2</sub>CHH), 1.61 – 1.53 (m, 1H, Pip NCH<sub>2</sub>CHH), 1.52 – 1.35 (m, 3H, Pip NCH<sub>2</sub>CHH, Pip CHCHHCHH), 1.17 (d,  $^3J = 6.2$  Hz, 3H, Thr CH<sub>3</sub> R1), 1.14 (d,  $^3J = 6.3$  Hz, 3H, Thr CH<sub>3</sub> R2), 1.02 (d,  $^3J = 6.1$  Hz, 3H, Val CH<sub>3</sub> R2), 0.99 (d,  $^3J = 6.6$  Hz, 3H, Val CH<sub>3</sub> R1), 0.96 (d,  $^3J = 6.6$  Hz, 3H, Val CH<sub>3</sub> R2), 0.94 – 0.89 [m, 9H, SiC(CH<sub>3</sub>)<sub>3</sub>]<sup>◇</sup>, 0.90 – 0.88 [m, 9H, SiC(CH<sub>3</sub>)<sub>3</sub>]<sup>◇</sup>, 0.85 (d,  $^3J = 6.8$  Hz, 3H, Val CH<sub>3</sub> R1), 0.10 (s, 3H, SiCH<sub>3</sub>), 0.07 (s, 3H, SiCH<sub>3</sub>), 0.05 (s, 3H, SiCH<sub>3</sub>), 0.04 (s, 3H, SiCH<sub>3</sub>).

<sup>◇</sup>Signals overlap.

$^{13}\text{C-NMR}$  (126 MHz,  $\text{CDCl}_3$ , 300 K):  $\delta$  (ppm) = 171.3 (s, Thr CO) $^\diamond$ , 171.1 (s,  $\text{CO}_2\text{CH}_3$ ) $^\diamond$ , 171.1 (s, Pip CO) $^\diamond$ , 170.8 (s, Val CO) $^\diamond$ , 70.7 (d, Gls CH), 68.8 (d, Thr CHOTBS), 66.3 (t, Gls  $\text{CH}_2$ ), 61.9 (d, Val NMeCH), 59.3 (d, Pip CH), 54.8 (d, Thr CHNH), 52.4 (q,  $\text{CO}_2\text{CH}_3$ ), 45.1 (t, Pip  $\text{NCH}_2$ ), 32.0 (q, Val  $\text{NCH}_3$  R1), 29.4 (q, Val  $\text{NCH}_3$  R2), 27.9 [d, Val  $\text{CH}(\text{CH}_3)_2$  R1], 25.9 [q,  $\text{SiC}(\text{CH}_3)_3$ ], 25.9 (t, Pip  $\text{NCHCH}_2$ ), 25.7 [q,  $\text{SiC}(\text{CH}_3)_3$ ], 24.9 (t, Pip  $\text{CHCH}_2\text{CH}_2$ ), 23.4 (q, Thr  $\text{CH}_3$ ), 21.1 (t, Pip  $\text{NCH}_2\text{CH}_2$ ), 19.7 (q,  $\text{CHCH}_3\text{CH}_3$ ), 19.3 (q,  $\text{CHCH}_3\text{CH}_3$ ), 18.4 [s,  $\text{SiC}(\text{CH}_3)_3$ ], 18.0 [s,  $\text{SiC}(\text{CH}_3)_3$ ], -4.4 (q,  $\text{SiCH}_3$ ), -4.9 (q,  $\text{SiCH}_3$ ), -5.0 (q,  $\text{SiCH}_3$ ), -5.3 (q,  $\text{SiCH}_3$ ).

$^\diamond$ Assignment interchangeable.

$^1\text{H-NMR}$ :

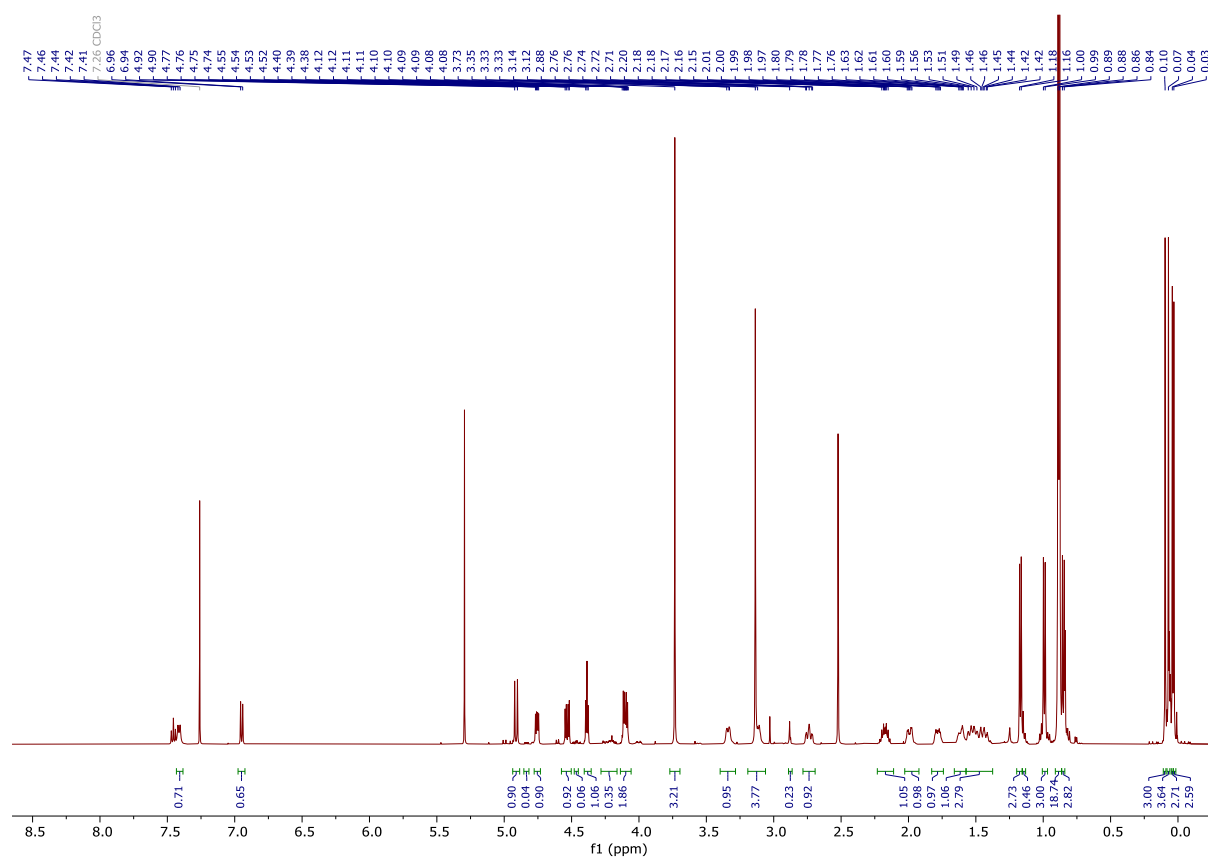

$^{13}\text{C}$ -NMR:

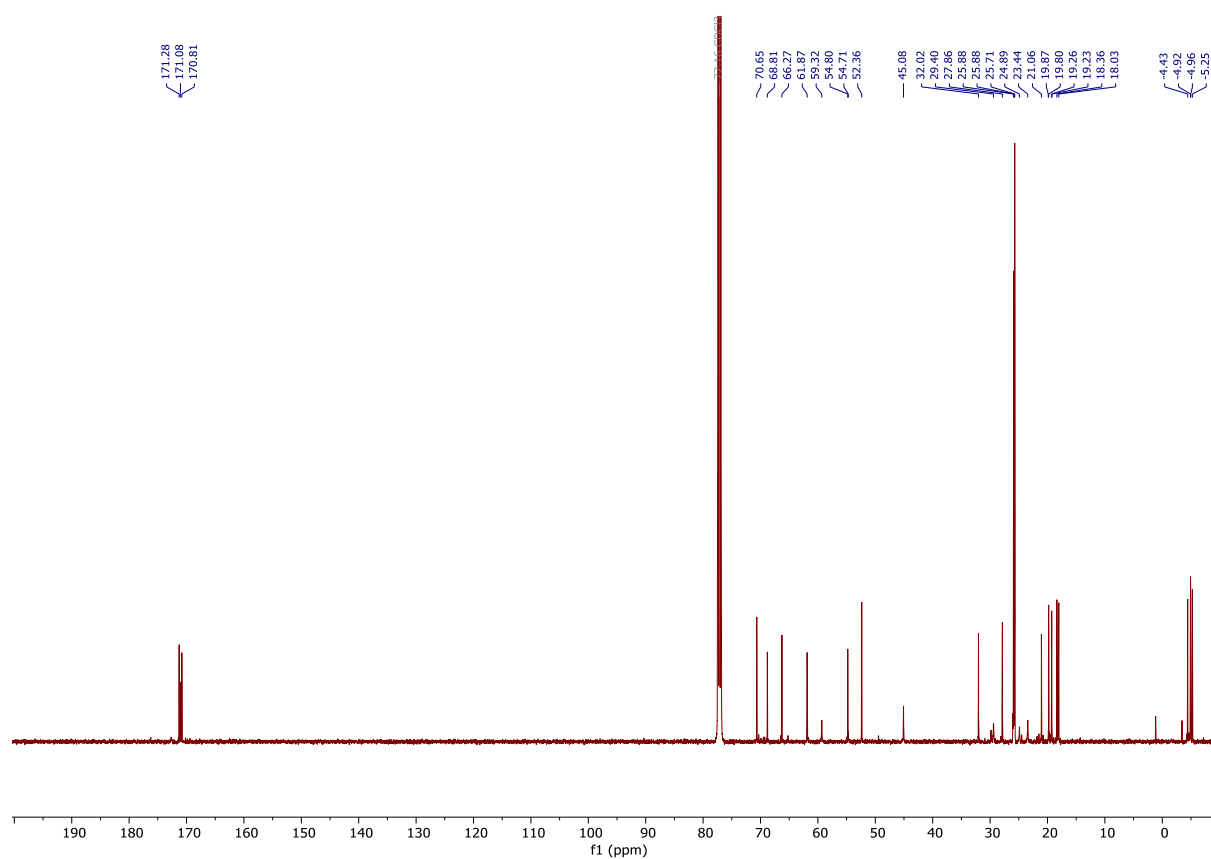

***N*-Boc-L-Ala-D-Leu-L-ThioPro-L-Ser(*O*-TBS)-(Z)-Dhb-Pro-L-Thr(*O*-TBS)-(N-Me)L-Val-L-Gls(*O*-TBS)-*O*-Me (Z-7)**

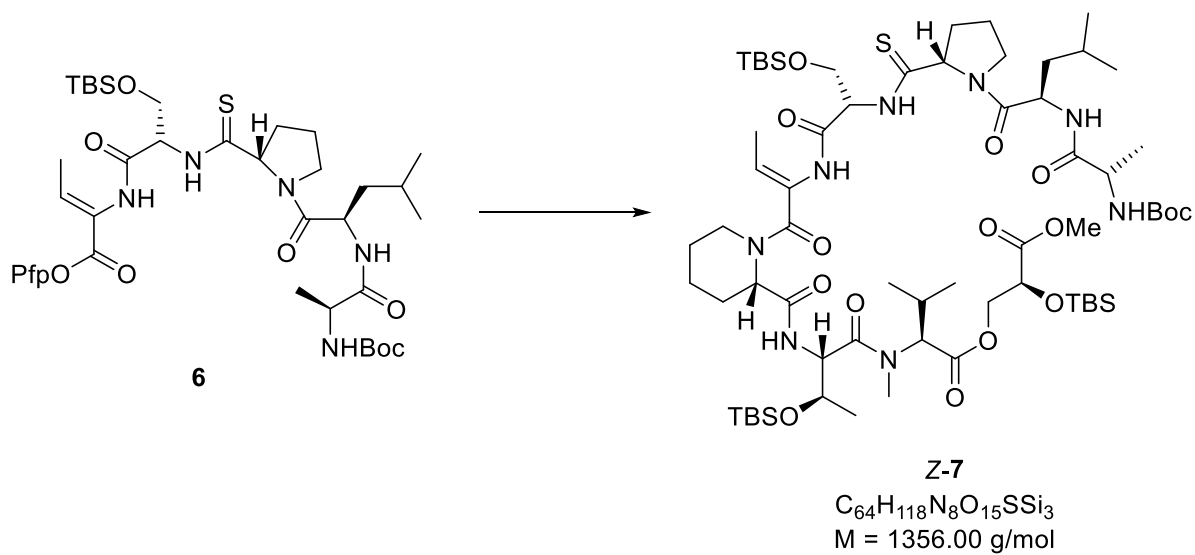

To a solution of pentafluorophenyl ester **6** (412 mg, 469  $\mu\text{mol}$ , 1.00 equiv.) in THF (3 mL), a solution of peptide **5** (347 mg, 515  $\mu\text{mol}$ , 1.10 equiv.) in THF (3 mL) is added, and the reaction mixture is stirred at room temperature for 15 minutes. Subsequently, it is heated to 50 °C and stirred at this temperature for 18 hours. After cooling the reaction solution to room temperature, the solvent is removed under reduced pressure, and the residue is purified by column chromatography (silica gel:  $\varnothing$  3 cm,  $\uparrow$  20 cm, n-pentane/EtOAc = 5/1  $\rightarrow$  4/1  $\rightarrow$  3/1  $\rightarrow$  2/1). This process yields nonapeptide *Z*-**7** (302 mg, 222  $\mu\text{mol}$ , 48%) as a colorless solid.

**TLC:**  $R_f = 0.62$  (*n*-Pentan/EtOAc = 2/1) [UV,  $\text{KMnO}_4$ ].

**M.p.:** 86 °C.

**Specific rotation:**  $[\alpha]_D^{RT} = -170.0$  ( $c = 10.0$ ,  $\text{CHCl}_3$ ).

**IR** (ATR):  $\tilde{\nu}$  ( $\text{cm}^{-1}$ ) = 3283 (m, OH), 2957 (m,  $-(\text{CH}_2)-\text{H}$ ), 2931 (m,  $-(\text{CH}_2)-\text{H}$ ), 1744 (s, C=O), 1651 (s, C=O), 1530 (s), 1442 (m), 1389 (s,  $-(\text{CH})-\text{H}$ ), 1365 (m), 1254 (m), 1160 (m, C=O), 1104 (m), 1006 (m), 838 (m), 779 (m).

**Rotamer ratio:** R1/R2  $\approx$  71/29.

**$^1\text{H-NMR}$**  (500 MHz,  $\text{CDCl}_3$ , 298 K):  $\delta$  (ppm) = 8.85 (d,  $^3J = 7.6$  Hz, 1H, Ser NH), 8.26 (s, 1H, Dhb NH R1), 8.13 – 8.01 (m, 3H, Leu NH R2, Dhb NH R2, Thr NH R2), 7.84 (d,  $^3J = 7.2$  Hz, 1H, Thr NH R1), 7.70 (d,  $^3J = 8.5$  Hz, 1H, Leu NH R1), 7.53 (d,  $^3J = 8.4$  Hz, 1H, Ala NH R1), 6.98 (d,  $^3J = 8.4$  Hz, 1H, Ala NH R2), 5.54 (q,  $^3J = 6.9$  Hz, 1H, Dhb CH R2), 5.32 – 5.12 (m, 3H, Dhb CH R1, Ser CH, Pip CH R2), 5.07 – 4.85 (m, 4H, Val CH R1, ThioPro CH, Pip CH R1, Thr CHNH R2), 4.71 – 3.87 (m, 11H, Thr CHNH R1, Leu CH, Ala CH, Pip NCHH, ThioPro NCHH, Ser CHH, Gls CH, Gls  $\text{CH}_2$ , Thr CHOH, Val CH R2), 3.77 – 3.66 (m, 4H,  $\text{CO}_2\text{CH}_3$ , Ser CHH R1), 3.65 – 3.51 (m, 2H, ThioPro NCHH, Ser CHH R2), 3.19 – 3.06 (m, 4H, Val  $\text{CH}_3$  R1, Pip NCHH), 2.89 (s, 3H, Val  $\text{CH}_3$  R2), 2.55 – 2.36 (m, 3H, ThioPro CHCHH, Pip CHCHH), 2.32 – 1.94 [m, ThioPro CHCHH, Pip CHCHH, ThioPro  $\text{NCH}_2\text{CH}_2$ , Val  $\text{CH}(\text{CH}_3)_2$ ], 1.83 (d,  $^3J = 6.9$  Hz, 3H, Dhb  $\text{CH}_3$  R1), 1.78 – 1.65 [m, 5H, Dhb  $\text{CH}_3$  R2, Pip  $\text{NCH}_2\text{CHH}$ , Leu  $\text{CH}(\text{CH}_3)_2$  R2], 1.65 – 1.51 [m, 3H, Leu  $\text{CH}(\text{CH}_3)_2$ , Pip  $\text{NCH}_2\text{CHH}$ , Pip  $\text{CHCH}_2\text{CHH}$ ], 1.49 – 1.32 [m, 12H,  $\text{OC}(\text{CH}_3)_3$ , Leu  $\text{CH}_2$ , Pip  $\text{CHCH}_2\text{CHH}$ ], 1.31 – 1.11 (m, 9H, Ala  $\text{CH}_3$ , Thr  $\text{CH}_3$ , Val  $\text{CH}_3$ ), 1.04 – 0.73 [m, 36H, Val  $\text{CH}_3$ ,  $\text{SiC}(\text{CH}_3)_3$ , Leu  $(\text{CH}_3)_2$ ], 0.12 – 0.03 (m, 18H,  $\text{SiCH}_3$ ).

<sup>13</sup>C-NMR (126 MHz, CDCl<sub>3</sub>, 300 K):  $\delta$  (ppm) = 204.0 (s, CS R2), 203.9 (s, CS R1), 174.8 (s, Ala CO R2), 174.6 (s, Ala CO R1), 173.4 (s, Leu CO R2), 173.3 (s, Leu CO R1), 172.5 (s, Val CO R1), 172.2 (s, Val CO R2), 171.8 (s, Glu CO R2), 171.3 (s, Glu CO R1), 170.7 (s, Thr CO R2)<sup>♦</sup>, 170.5 (s, Thr CO R1)<sup>♦</sup>, 170.1 (s, Pip CO R2)<sup>♦</sup>, 169.9 (s, Pip CO R1)<sup>♦</sup>, 169.8 (s, Ser CO R2)<sup>♦</sup>, 169.7 (s, Ser CO R1)<sup>♦</sup>, 169.5 (s, Dhb CO R1)<sup>♦</sup>, 169.4 (s, Dhb CO R2)<sup>♦</sup>, 157.3 (s, NHCO<sub>2</sub> R2), 157.2 (s, NHCO<sub>2</sub> R1), 129.6 (s, Dhb CCH R2), 128.3 (s, Dhb CCH R1), 119.6 (d, Dhb CH R1), 117.0 (d, Dhb CH R2), 79.4 [s, OC(CH<sub>3</sub>)<sub>3</sub> R1], 79.2 [s, OC(CH<sub>3</sub>)<sub>3</sub> R2], 70.6 (d, Glu CH R1), 70.0 (d, ThioPro CH R1), 69.6 (d, Glu CH R2), 69.3 (d, ThioPro CH), 67.5 (d, Thr CHOH), 67.0 (d, Thr CHOH), 66.3 (t, Glu CH<sub>2</sub> R1), 65.3 (t, Glu CH<sub>2</sub> R2), 62.1 (d, Val NMeCH R1), 61.9 (d, Val NMeCH R2), 61.4 (t, Ser CH<sub>2</sub> R2), 61.2 (d, Ser CH<sub>2</sub> R1), 61.1 (t, Ser CH R1), 60.7 (d, Ser CH R2), 56.3 (d, Thr CHNH R1), 55.5 (d, Thr CHNH R2), 53.6 (d, Pip CH R2), 53.5 (d, Pip CH R1), 52.7 (q, CO<sub>2</sub>CH<sub>3</sub> R2), 52.4 (q, CO<sub>2</sub>CH<sub>3</sub> R1), 50.1 (d, Leu CHNH R2), 49.8 (d, Leu CHNH R1), 49.5 (d, Ala CH R1), 49.3 (d, Ala CH R2), 48.5 (t, ThioPro NCH<sub>2</sub> R1), 47.9 (t, ThioPro NCH<sub>2</sub> R2), 47.5 (t, Pip NCH<sub>2</sub> R1), 47.1 (t, Pip NCH<sub>2</sub> R2), 40.6 (t, Leu CH<sub>2</sub> R1), 40.4 (t, Leu CH<sub>2</sub> R2), 33.2 (t, ThioPro CHCH<sub>2</sub> R2), 33.1 (t, ThioPro CHCH<sub>2</sub> R1), 32.1 (q, Val NCH<sub>3</sub> R1), 29.8 (q, Val NCH<sub>3</sub> R2), 28.4 [q, OC(CH<sub>3</sub>)<sub>3</sub>], 27.7 [d, Val CH(CH<sub>3</sub>)<sub>2</sub> R1], 26.1 [d, Val CH(CH<sub>3</sub>)<sub>2</sub> R2], 25.9 (t, Pip CHCH<sub>2</sub>CH<sub>2</sub> R2), 25.8 [q, SiC(CH<sub>3</sub>)<sub>3</sub>], 25.7 (t, Pip CHCH<sub>2</sub>CH<sub>2</sub> R1), 25.3 (t, Pip CHCH<sub>2</sub>), 25.0 [d, Leu CH(CH<sub>3</sub>)<sub>2</sub> R2], 24.8 [d, Leu CH(CH<sub>3</sub>)<sub>2</sub> R1]<sup>♦</sup>, 24.7 (t, ThioPro NCH<sub>2</sub>CH<sub>2</sub>)<sup>♦</sup>, 23.5 (q, Leu CH<sub>3</sub>), 22.0 (q, Leu CH<sub>3</sub>), 21.3 (t, Pip NCH<sub>2</sub>CH<sub>2</sub>), 20.1 (q, Thr CH<sub>3</sub> R2), 19.9 (q, Thr CH<sub>3</sub> R1), 19.6 (q, Val CH<sub>3</sub> R2), 19.1 [s, SiC(CH<sub>3</sub>)<sub>3</sub>], 18.5 (q, Val CH<sub>3</sub> R2), 18.3 (q, Val CH<sub>3</sub> R1), 18.1 [s, SiC(CH<sub>3</sub>)<sub>3</sub>], 15.7 (q, Ala CH<sub>3</sub> R1), 15.4 (q, Ala CH<sub>3</sub> R2), 12.2 (q, Dhb CH<sub>3</sub> R1), 12.0 (q, Dhb CH<sub>3</sub> R2), -3.5 [q, Si(CH<sub>3</sub>)<sub>2</sub>], -5.0 [q, Si(CH<sub>3</sub>)<sub>2</sub>], -5.3 [q, Si(CH<sub>3</sub>)<sub>2</sub>].

♦/♦/♦ Assignment interchangeable.

**HR-MS** (ESI): [C<sub>64</sub>H<sub>118</sub>N<sub>8</sub>O<sub>15</sub>SSi<sub>3</sub>+H]<sup>+</sup> calculated: 1355.7818; found: 1355.7795.

[C<sub>64</sub>H<sub>118</sub>N<sub>8</sub>O<sub>15</sub>SSi<sub>3</sub>+Na]<sup>+</sup> calculated: 1377.7637; found: 1377.7615.





## (Z)-Macrocycle (Z-8)

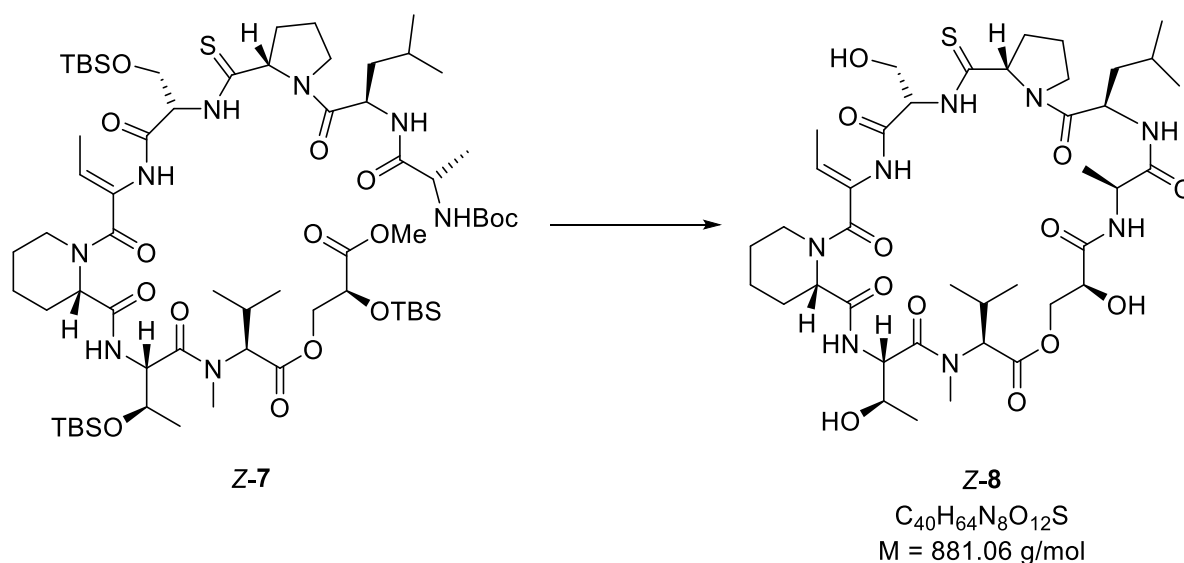

### Ester Hydrolysis:

A solution of nonapeptide Z-7 (335 mg, 247  $\mu$ mol, 1.00 equiv.) in DCE (28 mL) is treated with  $Me_3SnOH$  (357 mg, 1.98 mmol, 8.00 equiv.) and the reaction mixture is stirred at 80 °C for 48 hours. Subsequently, the mixture is cooled to room temperature, and a 5% citric acid solution (15 mL) is added. The emulsion is stirred for 10 minutes, the resulting phases are separated, and the aqueous phase is extracted with EtOAc (2  $\times$  25 mL). The combined organic phases are washed with 5% citric acid solution (2  $\times$  20 mL) and NaCl solution (20 mL), dried over  $Na_2SO_4$ , and filtered. The residue is purified by column chromatography (silica gel:  $\varnothing$  2 cm,  $\uparrow$  18 cm,  $CH_2Cl_2/MeOH/AcOH = 100/1/0.01 \rightarrow 20/1/0.01$ ) to remove residual tin reagent, yielding a colorless solid (190 mg).

### Boc Deprotection:

The obtained solid is dissolved in  $CH_2Cl_2$  (9 mL) and cooled to 0 °C, then treated with TFA (2.4 mL) and stirred at this temperature for 90 minutes. After adding water (10 mL), the aqueous phase is adjusted to pH = 7 using 1 M sodium hydroxide and  $NaHCO_3$  solution and extracted with EtOAc (2  $\times$  40 mL). The combined organic phases are washed with NaCl solution (30 mL), dried over  $Na_2SO_4$ , and filtered. The solvent is removed under reduced pressure, and the residue is dried by azeotropic distillation (PhMe, 2  $\times$  15 mL). The resulting yellowish solid is used in the next reaction without further purification.

### Macrolactamization:

A solution of the yellowish solid in CH<sub>2</sub>Cl<sub>2</sub> (5 mL) is slowly added over four hours to a solution of HATU (127 mg, 387 μmol, 1.57 equiv.) and 2,4,6-collidine (82.1 μL, 75.1 mg, 620 μmol, 2.51 equiv.) in CH<sub>2</sub>Cl<sub>2</sub> (55 mL). The reaction mixture is stirred for 16 hours, and then water (25 mL) is added. The phases are separated, the aqueous phase is saturated with solid NaCl, and extracted with CH<sub>2</sub>Cl<sub>2</sub> (2 × 25 mL). The combined organic phases are washed with 10% citric acid (25 mL), NaHCO<sub>3</sub> (25 mL), and NaCl solution, and the washing solutions are back-extracted with CH<sub>2</sub>Cl<sub>2</sub> (10 mL each). The combined organic phases are dried over Na<sub>2</sub>SO<sub>4</sub>, filtered, and the solvent is removed under reduced pressure. The crude product is dissolved in dry MeCN (10 mL) and filtered through Celite to remove inorganic salts. After washing the filter cake several times with MeCN, the solvent is removed under reduced pressure. The resulting yellowish resin (172 mg) is used in the next reaction without further purification.

### TBS Deprotection:

A solution of the yellowish resin in dry MeCN (21 mL) is cautiously treated with HF (48% in water, 1.09 mL) and stirred at room temperature for 24 hours. The reaction is quenched by adding Na<sub>2</sub>CO<sub>3</sub> solution (20 mL), and the aqueous phase is extracted with EtOAc (3 × 15 mL). The combined organic phases are washed with NaCl solution (20 mL), dried over Na<sub>2</sub>SO<sub>4</sub>, and filtered. Before completely removing the solvent, Celite is added. The Celite loaded with the crude product is purified by column chromatography (silica gel: Ø 2 cm, ↑ 17 cm, CH<sub>2</sub>Cl<sub>2</sub>/MeOH = 75/1 → 50/1 → 40/1 → 30/1 → 20/1 → 10/1). Approximately 94 mg of a colorless solid are obtained, which is still impure. This is further purified by semi-preparative HPLC (*Phenomenex* Luna 5u Silica, 20 × 250 mm, <sup>i</sup>PrOH/*n*-Heptane = 20/80, r.t., 15 mL·min<sup>-1</sup>, 215 nm, t<sub>R</sub> (Z-8) = 12.5 min, Injection concentration: 94 mg mL<sup>-1</sup>). After lyophilization (distilled water), the macrocycle Z-8 (55.5 mg, 63.0 μmol, 26% over 4 steps) is obtained as an amorphous, colorless solid.

**TLC:** R<sub>f</sub> = 0.48 (CH<sub>2</sub>Cl<sub>2</sub>/MeOH = 9/1) [UV, KMnO<sub>4</sub>].

**M.p.:** 176 °C.

**Specific rotation:** [α]<sub>D</sub><sup>RT</sup> = -182.0 (c = 10.0, CHCl<sub>3</sub>).

**IR** (ATR):  $\tilde{\nu}$  (cm<sup>-1</sup>) = 3292 (m, OH), 2961 (m, -(CH<sub>2</sub>)-H), 1747 (s, C=O), 1639 (s, C=O), 1524 (s), 1441 (m), 1261 (m), 1192 (m), 1158 (m, C=O), 1065 (m), 753 (m), 665 (m).

**Rotamer ratio:** R1/R2  $\approx$  90/10.

**$^1\text{H-NMR}$**  (500 MHz,  $\text{CDCl}_3$ , 298 K):  $\delta$  (ppm) = 8.64 (s, 2H, Dhb NH R1, Ser NH R2), 8.58 (s, 1H, Dhb NH R2), 8.46 (d,  $^3J = 8.4$  Hz, 1H, Ser NH R1), 7.77 (d,  $^3J = 10.0$  Hz, 1H, Thr NH R2), 7.64 (d,  $^3J = 9.3$  Hz, 1H, Ala NH R2), 7.57 (d,  $^3J = 8.9$  Hz, 2H, Ala NH R1, Leu NH R1), 7.48 (d,  $^3J = 8.5$  Hz, 1H, Thr CHNH R1), 6.85 (s, 1H, Leu NH R2), 5.54 (q,  $^3J = 7.0$  Hz, 1H, Dhb CH R1), 5.40 – 5.35 (m, 1H, Ser CH R2), 5.27 (q,  $^3J = 7.0$  Hz, 1H, Dhb CH R2), 5.23 – 5.19 (m, 1H, Pip CH R2), 5.18 – 5.12 (m, 1H, Ser CH R1), 5.04 – 5.00 (m, 1H, Pip CH R1), 4.99 – 4.94 (m, 2H, ThioPro CH, Thr CH R2), 4.90 – 4.81 (m, 3H, Leu CH, Glc CHH R2, Glc CHH R2), 4.75 – 4.59 (m, 3H, Thr CHNH R1, Ala CH, Glc CHH R1), 4.53 – 4.46 (m, 1H, Glc CH R2), 4.43 – 4.35 (m, 2H, Ser CHH, Glc CH R1), 4.33 – 4.25 (m, 2H, Pip NCHH, Glc CHH R1), 4.20 (d,  $^3J = 6.8$  Hz, 1H, Val NMeCH R2), 4.13 – 4.02 (m, 2H, Val NMeCH R1, ThioPro NCHH R1), 4.02 – 3.92 (m, 2H, ThioPro NCHH R2, Thr CHOH), 3.71 (dt,  $^2J = 10.4$  Hz,  $^3J = 7.2$  Hz, 1H, ThioPro NCHH), 3.62 – 3.55 (m, 1H, Ser CHH), 3.17 (s, 3H, Val  $\text{CH}_3$  R1), 3.08 – 2.99 (m, 1H, Pip NCHH), 2.78 (s, 3H, Val  $\text{CH}_3$  R2), 2.51 – 2.33 [m, 3H, ThioPro CHCHH, Val  $\text{CH}(\text{CH}_3)_2$  R1, Pip CHCHH], 2.29 – 2.19 [m, 2H, ThioPro NCHCHH, Val  $\text{CH}(\text{CH}_3)_2$  R2], 2.08 – 1.98 (m, 1H, Pip CHCHH), 1.82 (d,  $^3J = 7.0$  Hz, 3H, Dhb  $\text{CH}_3$ ), 1.79 – 1.66 (m, 4H, Pip  $\text{NCH}_2\text{CH}_2$ , ThioPro  $\text{NCH}_2\text{CH}_2$ ), 1.65 – 1.55 [m, 2H, Leu CHH, Leu  $\text{CH}(\text{CH}_3)_2$ ], 1.53 (d,  $^3J = 7.0$  Hz, 3H, Ala  $\text{CH}_3$ ), 1.51 – 1.41 (m, 3H, Leu CHH, Pip  $\text{CHCH}_2\text{CH}_2$ ), 1.37 (d,  $^3J = 6.9$  Hz, 3H, Ala  $\text{CH}_3$  R2), 1.31 (d,  $^3J = 6.4$  Hz, 3H, Thr  $\text{CH}_3$  R1), 1.15 (d,  $^3J = 6.3$  Hz, 3H, Thr  $\text{CH}_3$  R2), 1.08 – 1.04 (m, 3H, Val  $\text{CH}_3$  R2), 1.01 (d,  $^3J = 6.5$  Hz, 3H, Val  $\text{CH}_3$  R1), 0.92 [m, 9H, Val  $\text{CH}_3$ , Leu  $\text{CH}(\text{CH}_3)_2$ ].

**$^{13}\text{C-NMR}$**  (126 MHz,  $\text{CDCl}_3$ , 300 K):  $\delta$  (ppm) = 204.1 (s, CS R2), 203.4 (s, CS R1), 173.8 (s, Ala CO R1), 173.3 (s, Ala CO R2), 173.0 (s, Thr CO R2), 172.9 (s, Leu CO R2), 172.6 (s, Leu CO R1), 171.4 (s, Glc CO R2), 171.2 (s, Thr CO R1)  $\spadesuit$ , 171.1 (s, Val CO R1)  $\spadesuit$ , 171.1 (s, Pip CO)  $\spadesuit$ , 170.8 (s, Glc CO R1), 170.6 (s, Ser CO R1), 169.6 (s, Ser CO R2), 169.4 (s, Val CO R2), 169.1 (s, Dhb CO R2), 168.4 (s, Dhb CO R1), 129.1 (s, Dhb CCH R1), 128.4 (s, Dhb CCH R2), 121.6 (d, Dhb CH R1), 117.4 (d, Dhb CH R2), 70.9 (d, Glc CH R1), 70.2 (d, Glc CH R2), 69.6 (d, ThioPro CH), 68.2 (d, Val NMeCH R2), 66.2 (d, Thr CHOH), 66.2 (d, Val NMeCH R1), 65.9 (t, Glc  $\text{CH}_2$  R1), 65.7 (t, Glc  $\text{CH}_2$  R2), 61.0 (t, Ser  $\text{CH}_2$  R2), 60.1 (d, Ser CH R2), 60.0 (t, Ser  $\text{CH}_2$  R1), 59.8 (d, Ser CH R1), 55.6 (d, Thr CHNH R1), 53.9 (d, Pip CH R1), 53.8 (d, Pip CH R2), 52.1 (d, Thr CHNH R2), 50.3 (d, Leu CHNH R2), 49.5 (d, Leu CHNH R1), 48.6 (t, ThioPro  $\text{NCH}_2$ ), 48.4 (d, Ala CH R1), 48.0 (d, Ala CH R2), 47.3 (t, Pip  $\text{NCH}_2$  R1), 46.7 (t, Pip  $\text{NCH}_2$  R2), 40.6 (t, Leu  $\text{CH}_2$  R1), 40.2 (t, Leu  $\text{CH}_2$  R2), 34.4 (q, Val  $\text{NCH}_3$  R1), 33.0 (t, ThioPro

CHCH<sub>2</sub> R2), 32.4 (t, ThioPro CHCH<sub>2</sub> R1), 29.6 (q, Val NCH<sub>3</sub> R2), 27.0 [d, Val CH(CH<sub>3</sub>)<sub>2</sub> R2], 26.7 [d, Val CH(CH<sub>3</sub>)<sub>2</sub> R1], 25.4 (t, ThioPro NCH<sub>2</sub>CH<sub>2</sub> R2), 25.3 (t, ThioPro NCH<sub>2</sub>CH<sub>2</sub> R1)\*, 25.1 (t, Pip CHCH<sub>2</sub>CH<sub>2</sub>)\*, 24.8 [d, Leu CH(CH<sub>3</sub>)<sub>2</sub>]\*, 24.7 (t, Pip CHCH<sub>2</sub> R1)\*, 24.5 (t, Pip CHCH<sub>2</sub> R2), 23.2 (q, Leu CH<sub>3</sub> R2), 22.9 (q, Leu CH<sub>3</sub> R1), 22.6 (q, Leu CH<sub>3</sub> R1), 22.1 (q, Leu CH<sub>3</sub> R2), 21.4 (t, Pip NCH<sub>2</sub>CH<sub>2</sub> R2), 21.2 (t, Pip NCH<sub>2</sub>CH<sub>2</sub> R1), 20.5 (q, Val CH<sub>3</sub> R1), 20.5 (q, Thr CH<sub>3</sub> R1), 19.8 (q, Thr CH<sub>3</sub> R2), 19.7 (q, Val CH<sub>3</sub> R2), 19.5 (q, Ala CH<sub>3</sub>), 19.0 (q, Val CH<sub>3</sub>), 18.8 (q, Ala CH<sub>3</sub> R2), 18.3 (q, Val CH<sub>3</sub> R2), 12.4 (q, Dhb CH<sub>3</sub> R1), 12.0 (q, Dhb CH<sub>3</sub> R2).

♦/\*/\* Assignment interchangeable.

**HR-MS (ESI):** [C<sub>40</sub>H<sub>64</sub>N<sub>8</sub>O<sub>12</sub>S+H]<sup>+</sup> calculated: 881.4437; found: 881.4420.

[C<sub>40</sub>H<sub>64</sub>N<sub>8</sub>O<sub>12</sub>S+Na]<sup>+</sup> calculated: 903.4256; found: 903.4237.

<sup>1</sup>H-NMR:

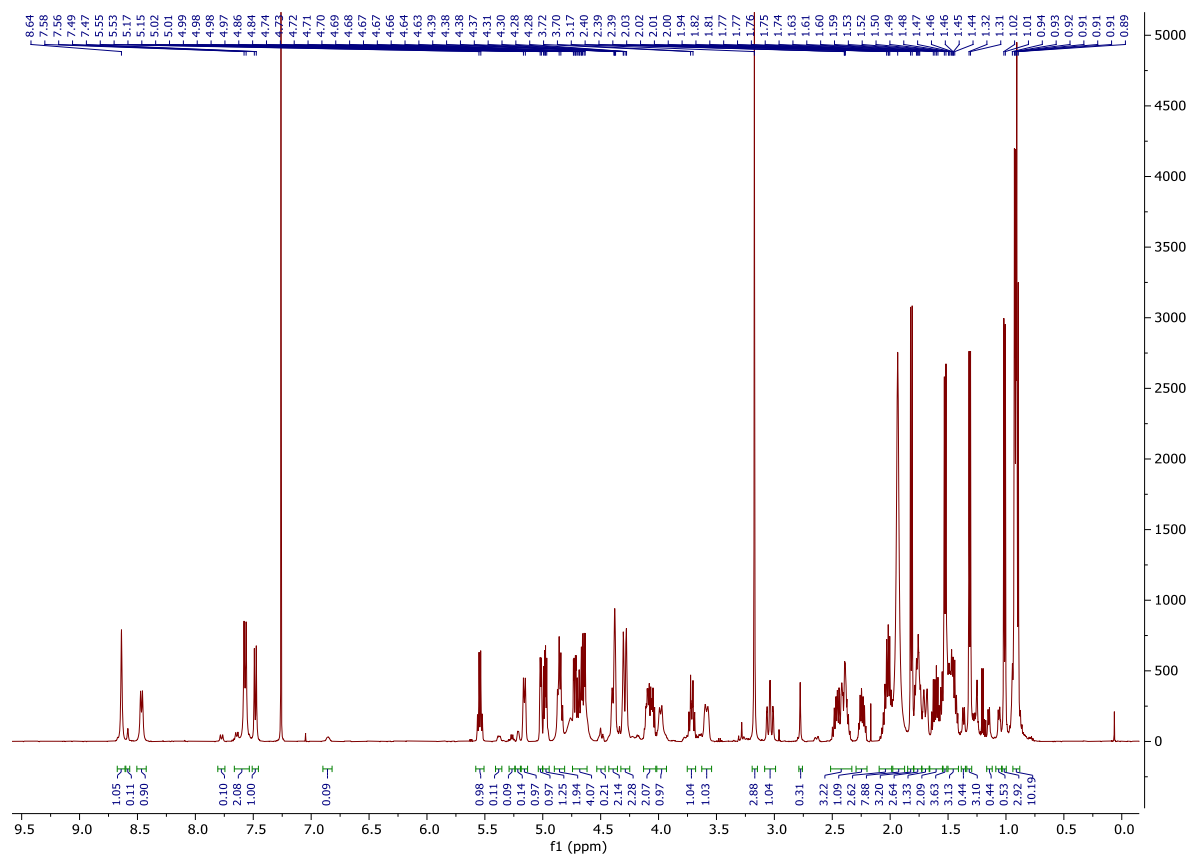

<sup>13</sup>C-NMR:

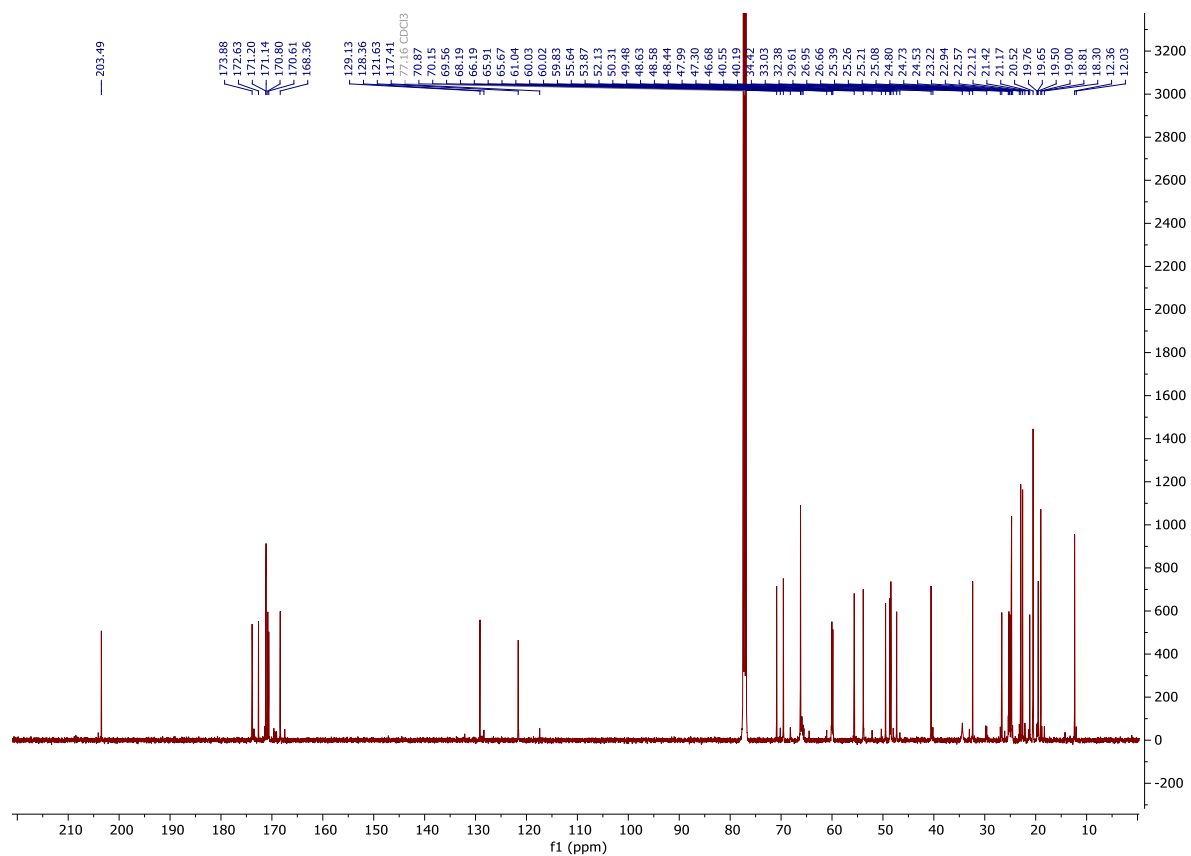

### Vioprolide B (1)

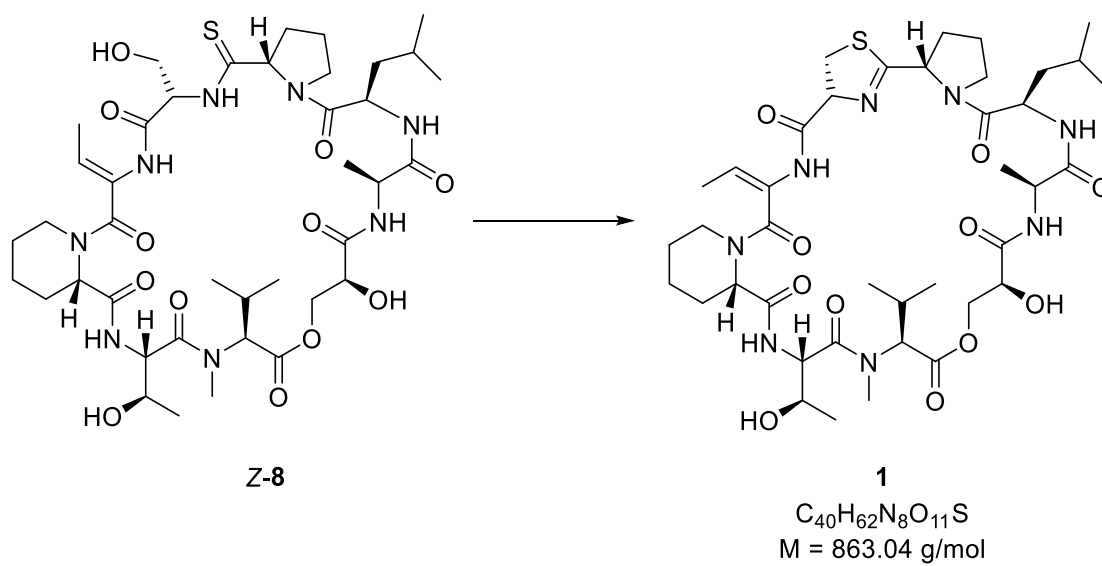

### Cyclization:

A solution of macrocycle **Z-8** (25 mg, 28.4  $\mu\text{mol}$ , 1.00 equiv.) in THF (2.2 mL) is placed in a Schlenk flask containing  $\text{PPh}_3$  (11.2 mg, 42.6  $\mu\text{mol}$ , 1.50 equiv.). To this solution, a solution of DIAD (8.36  $\mu\text{L}$ , 8.61 mg, 42.6  $\mu\text{mol}$ , 1.50 equiv.) in THF (0.6 mL) is slowly added dropwise, and the resulting yellow solution is stirred at room temperature for 22 hours. Subsequently, a small amount of silica gel is added to the reaction solution, and the solvent is removed under reduced pressure. The silica gel loaded with the crude product is purified by column chromatography (silica gel:  $\varnothing$  1 cm,  $\uparrow$  14 cm,  $\text{CH}_2\text{Cl}_2/\text{MeOH} = 30/1 \rightarrow 20/1 \rightarrow 10/1$ ), yielding approximately 28 mg of a colorless solid, still contaminated with residues of starting materials and reagents. This is further purified by semi-preparative HPLC (*Phenomenex* Luna 5u Silica,  $20 \times 250$  mm,  $^i\text{PrOH}/n\text{-Heptane} = 50/50$ , r.t.,  $15 \text{ mL} \cdot \text{min}^{-1}$ , 215 nm,  $t_{\text{R}} = 10.1$  min, Injection concentration:  $28 \text{ mg} \cdot \text{mL}^{-1}$ ). After lyophilization (distilled water), (*Z*)-vioprolide B (15.5 mg, 18.0  $\mu\text{mol}$ , 63%) is obtained as an amorphous, colorless solid.

**TLC:**  $R_{\text{f}} = 0.42$  ( $\text{CH}_2\text{Cl}_2/\text{MeOH} = 9/1$ ) [UV,  $\text{KMnO}_4$ ].

### Iodination:

A solution of (*Z*)-vioprolide B (9.00 mg, 10.4  $\mu\text{mol}$ , 1.00 equiv.) in  $\text{CH}_2\text{Cl}_2$  (0.3 mL) is treated with NIS (2.23 mg, 9.91  $\mu\text{mol}$ , 0.95 equiv.) and DABCO (1.29 mg, 11.5  $\mu\text{mol}$ , 1.10 equiv.), and the yellow reaction solution is stirred for five hours under light exclusion. Subsequently, it is diluted with EtOAc (30 mL). It is sequentially washed with 10% citric acid (15 mL),  $\text{NaHCO}_3$  (15 mL), 1 M  $\text{Na}_2\text{S}_2\text{O}_3$  (15 mL), and NaCl solution (20 mL). Each washing solution is saturated with solid NaCl before use and back-extracted with EtOAc (10 mL each) after use. The combined organic phases are dried over  $\text{Na}_2\text{SO}_4$ , filtered, and the solvent is removed under reduced pressure. The residue is purified by a quick column chromatography (silica gel:  $\varnothing$  1 cm,  $\uparrow$  8 cm, EtOAc  $\rightarrow$   $\text{CH}_2\text{Cl}_2/\text{MeOH} = 20/1 \rightarrow 10/1$ ). This yields a colorless solid (14 mg), which is used in the next reaction without further purification.

**TLC:**  $R_{\text{f}} = 0.51$  ( $\text{CH}_2\text{Cl}_2/\text{MeOH} = 9/1$ ) [UV,  $\text{KMnO}_4$ ].

### Hydrodeiodination:

To a suspension of palladium on activated carbon (5 wt% Pd, 11.5 mg) in MeOH (0.9 mL), NEt<sub>3</sub> (1.73  $\mu$ L, 1.27 mg, 12.5  $\mu$ mol, 1.20 equiv.) is added. After exchanging the argon atmosphere with a hydrogen atmosphere according to the general procedure, the suspension is stirred at room temperature for 45 minutes. The iodinated crude product is dissolved in MeOH (0.9 mL) and also placed under a hydrogen atmosphere following the general procedure. This solution is added to the suspension and stirred for three hours under exclusion of light. The reaction is terminated by removing the hydrogen balloon and purging the reaction solution with argon for five minutes. After filtering the suspension over Celite and washing the filter cake with EtOAc (20 mL), the combined filtrate is washed with 1 M Na<sub>2</sub>S<sub>2</sub>O<sub>3</sub> solution (15 mL). The washing solution is saturated with solid NaCl before use and back-extracted with EtOAc (3  $\times$  15 mL) after use. Subsequently, the combined organic phases are washed with NaCl solution (25 mL), dried over Na<sub>2</sub>SO<sub>4</sub>, filtered, and the solvent is removed under reduced pressure. The residue is purified by column chromatography (silica gel:  $\varnothing$  1 cm,  $\uparrow$  9 cm, CH<sub>2</sub>Cl<sub>2</sub>/MeOH = 50/1  $\rightarrow$  25/1  $\rightarrow$  10/1), yielding approximately 8 mg of a colorless solid, still contaminated with residues of starting materials and reagents. This is further purified by semi-preparative HPLC (*Phenomenex* Luna 5u Silica, 20  $\times$  250 mm, <sup>i</sup>PrOH/*n*-Heptane = 20/80, r.t., 15 mL $\cdot$ min<sup>-1</sup>, 215 nm, t<sub>R</sub> (**1**) = 12.5 min, Injection concentration: 8 mg $\cdot$ mL<sup>-1</sup>). After lyophilization (distilled water), Vioprolide B (**1**, 3.15 mg, 3.65  $\mu$ mol, 35%) is obtained as an amorphous, colorless solid.

**TLC:** R<sub>f</sub> = 0.45 (CH<sub>2</sub>Cl<sub>2</sub>/MeOH = 9/1) [UV, KMnO<sub>4</sub>].

**M.p.:** 126 °C.

**Specific rotation:**  $[\alpha]_D^{RT} = -42.0$  ( $c = 10.0$ , CHCl<sub>3</sub>).

**IR** (ATR):  $\tilde{\nu}$  (cm<sup>-1</sup>) = 3292 (m, OH), 2992 (m, -(CH<sub>2</sub>)-H), 2928 (m, -(CH<sub>2</sub>)-H), 1742 (s, C=O), 1643 (s, C=O), 1517 (s), 1445 (m), 1376 (s, -(CH)-H), 1261 (m), 1196 (m), 1164 (m, C=O), 1021 (m), 797 (m).

**Rotamer ratio:** R1/R2  $\approx$  57/43.

**<sup>1</sup>H-NMR** (500 MHz, CDCl<sub>3</sub>, 292 K):  $\delta$  (ppm) = 9.32 (s, 1H, Dhb NH R2), 8.77 (s, 1H, Dhb NH R1), 8.35 (d, <sup>3</sup>J = 9.9 Hz, 1H, Thr NH R1), 7.78 (d, <sup>3</sup>J = 7.8 Hz, 1H, Thr NH R2), 7.28 – 7.22 (m, 1H, Ala NH R2)\*, 7.08 (d, <sup>3</sup>J = 9.8 Hz, Ala NH R1), 6.68 (d, <sup>3</sup>J = 10.0 Hz, Leu



NH R2), 6.24 (d,  $^3J = 9.9$  Hz, Leu NH R1), 5.69 (q,  $^3J = 7.2$  Hz, 1H, Dhb CH R2), 5.57 (d,  $^3J = 7.2$  Hz, 1H, Dhb CH R1), 5.24 (d,  $^3J = 5.2$  Hz, 1H, Pip CH R1), 5.21 – 5.17 (m, 1H, Pip CH R2), 5.11 (dd,  $^3J = 8.5$  Hz,  $^3J = 5.4$  Hz, 1H, ThioPro CH R2), 5.09 – 5.04 (m, 1H, Thz CH), 4.99 (dd,  $^3J = 8.4$  Hz,  $^3J = 5.0$  Hz, 1H, ThioPro CH R1), 4.95 (d,  $^3J = 10.1$  Hz, 1H, Thr CHNH R1)<sup>◊</sup>, 5.03 – 4.91 (m, 1H, Leu CH R2)<sup>◊</sup>, 4.91 – 4.85 (m, 1H, Leu CH R1), 4.81 (d,  $^3J = 10.8$  Hz, 1H, Glc CHH R2), 4.79 – 4.73 (m, 1H, Ala CH R2), 4.72 – 4.67 (m, 2H, Ala CH R1, Thr CHNH R2), 4.65 – 4.55 (m, 2H, Glc CH R1, Glc CHH R1), 4.41 – 4.36 (m, 1H, Glc CH R2), 4.28 (d,  $^3J = 10.6$  Hz, 1H, Val NMeCH R1), 4.24 – 4.13 (m, 2H, Thr CHOH, Glc CHH R1), 4.10 – 4.01 (m, 2H, Glc CHH R2, Pip NCHH), 3.88 – 3.77 (m, 2H, ThioPro NCHH R1, Thz CHH R2), 3.72 – 3.62 (m, 1H, ThioPro NCHH), 3.60 – 3.56 (m, 2H, Thz CHH R1, Thz CHH R1), 3.56 – 3.53 (m, 1H, ThioPro NCHH R2), 3.52 (s, 3H, Val NCH<sub>3</sub> R1), 3.49 – 3.46 (m, 1H, Thz CHH R2), 3.40 – 3.32 (m, 1H, Pip NCHH R1), 3.29 – 3.23 (m, 1H, Val NMeCH R2), 3.18 – 3.09 (m, 1H, Pip NCHH R2), 2.78 – 2.70 (m, 4H, Val NCH<sub>3</sub> R2, Pip CHCHH R1), 2.60 – 2.51 [m, 2H, Pip CHCHH R2, Val CH(CH<sub>3</sub>)<sub>2</sub> R1], 2.40 – 2.29 (m, 1H, ThioPro CHCHH), 2.27 – 2.17 [m, 2H, Val CH(CH<sub>3</sub>)<sub>2</sub> R2, ThioPro CHCH<sub>2</sub>CHH], 2.17 – 2.10 (m, 1H, ThioPro CHCHH R1), 2.09 – 1.95 (m, 2H, ThioPro CHCHH R2, ThioPro CHCH<sub>2</sub>CHH), 1.87 – 1.71 (m, 5H, Dhb CH<sub>3</sub>, Pip CHCH<sub>2</sub>CHH, Pip NCH<sub>2</sub>CHH R1)<sup>♦</sup>, 1.72 – 1.66 (m, 1H, Pip NCH<sub>2</sub>CHH R2)<sup>♦</sup>, 1.57 – 1.48 [m, 5H, Pip CHCH<sub>2</sub>CHH, Pip NCH<sub>2</sub>CHH, Pip CHCHH, Leu CHH, Leu CH(CH<sub>3</sub>)<sub>2</sub>], 1.46 – 1.37 (m, 1H, Leu CHH R1)<sup>◊</sup>, 1.40 (d,  $^3J = 6.8$  Hz, 3H, Ala CH<sub>3</sub> R2)<sup>◊</sup>, 1.33 (d,  $^3J = 7.1$  Hz, 3H, Ala CH<sub>3</sub> R1), 1.30 – 1.19 (m, 4H, Thr CH<sub>3</sub> R2, Leu CHH R2), 1.17 – 1.11 (m, 6H, Val CHCH<sub>3</sub>CH<sub>3</sub> R1, Thr CH<sub>3</sub> R1), 1.06 (d,  $^3J = 6.5$  Hz, 3H, Val CHCH<sub>3</sub>CH<sub>3</sub> R2), 0.98 – 0.80 [m, 9H, Val CHCH<sub>3</sub>CH<sub>3</sub>, Leu CH(CH<sub>3</sub>)<sub>2</sub>].

\*Signal and residual solvent proton signal overlap.

◊Signals overlap.

♦Assignment interchangeable.

<sup>13</sup>C-NMR (126 MHz, CDCl<sub>3</sub>, 300 K):  $\delta$  (ppm) = 181.1 (s, NCS R2), 180.5 (s, NCS R1), 172.9 (s, Thr CO R1), 172.4 (s, Thr CO R2), 171.7 (s, Ala CO), 171.5 (s, Leu CO R1), 171.4 (s, Glc CO R1), 171.2 (s, Thz CO R2, Leu CO R2), 170.8 (s, Glc CO R2), 170.2 (s, Pip CO R2), 169.6 (s, Val CO R1), 169.5 (s, Thz CO R1), 169.3 (s, Val CO R2), 169.2 (s, Pip CO R1), 167.4 (s, Dhb CO R1), 166.1 (s, Dhb CO R2), 128.8 (s, Dhb CCH R2), 128.7 (s, Dhb CCH R1), 118.6 (d, Dhb CH R2), 115.7 (d, Dhb CH R1), 77.8 (d, Thz CH R1), 76.8 (d, Thz CH R2)<sup>#</sup>, 71.7 (d, Glc CH R2), 70.1 (d, Val NMeCH R2), 69.5 (d, Glc CH R1), 68.0 (d, Thr CHOH R1), 66.8 (d,

Thr CHO<sub>H</sub> R2), 66.3 (t, Gl<sub>s</sub> CH<sub>2</sub> R2), 65.7 (t, Gl<sub>s</sub> CH<sub>2</sub> R1), 65.4 (d, Val NMeCH R1), 60.2 (d, ThioPro CH R2), 60.2 (d, ThioPro CH R1), 56.2 (d, Thr CHNH R2), 53.9 (d, Pip CH R1), 53.1 (d, Pip CH R2), 51.8 (d, Thr CHNH R1), 49.1 (d, Leu CH R1), 48.9 (d, Leu CH R2), 48.0 (t, ThioPro NCH<sub>2</sub> R2), 47.7 (t, ThioPro NCH<sub>2</sub> R1)<sup>◇</sup>, 47.7 (d, Ala CH R2)<sup>◇</sup>, 47.6 (d, Ala CH R1)<sup>◇</sup>, 46.3 (t, Pip NCH<sub>2</sub> R2), 46.2 (t, Pip NCH<sub>2</sub> R1), 40.7 (q, Val CH<sub>3</sub> R2), 40.2 (t, Leu CH<sub>2</sub> R2), 40.0 (t, Leu CH<sub>2</sub> R1), 37.8 (t, Thz CH<sub>2</sub> R2), 36.5 (t, Thz CH<sub>2</sub> R1), 30.4 (t, ThioPro CHCH<sub>2</sub> R1), 29.7 (q, Val CH<sub>3</sub> R1), 29.5 (t, ThioPro CHCH<sub>2</sub> R2), 29.0 [d, Val CH(CH<sub>3</sub>)<sub>2</sub> R2], 27.7 [d, Val CH(CH<sub>3</sub>)<sub>2</sub> R1], 26.7 (t, Pip NCHCH<sub>2</sub> R1), 26.1 (t, Pip NCHCH<sub>2</sub> R2), 25.7 (t, Pip NCH<sub>2</sub>CH<sub>2</sub> R2), 25.6 (t, Pip NCH<sub>2</sub>CH<sub>2</sub> R1), 25.5 (t, ThioPro NCH<sub>2</sub>CH<sub>2</sub> R2), 25.3 (t, ThioPro NCH<sub>2</sub>CH<sub>2</sub> R1), 24.7 [d, Leu CH(CH<sub>3</sub>)<sub>2</sub> R1], 24.4 [d, Leu CH(CH<sub>3</sub>)<sub>2</sub> R2], 22.9 (q, Leu CH<sub>3</sub> R1), 22.8 (q, Leu CH<sub>3</sub> R2), 22.6 (q, Leu CH<sub>3</sub> R2), 22.5 (q, Leu CH<sub>3</sub> R1), 21.7 (q, Val CH<sub>3</sub> R1), 21.2 (t, Pip CHCH<sub>2</sub>CH<sub>2</sub> R1), 21.1 (t, Pip CHCH<sub>2</sub>CH<sub>2</sub> R2), 20.1 (q, Thr CH<sub>3</sub> R2), 19.7 (q, Thr CH<sub>3</sub> R1), 19.7 (q, Val CH<sub>3</sub> R1), 19.6 (q, Val CH<sub>3</sub> R2), 19.4 (q, Val CH<sub>3</sub> R2), 19.1 (q, Ala CH<sub>3</sub> R2), 18.0 (q, Ala CH<sub>3</sub> R1), 13.7 (q, Dh<sub>b</sub> CH<sub>3</sub> R2), 13.1 (q, Dh<sub>b</sub> CH<sub>3</sub> R1).

<sup>#</sup>Signal and residual solvent proton signal overlap. Chemical shifts originates from the HMBC spectrum. The assignment to the rotamers is interchangeable.

<sup>◇</sup>Assignment interchangeable

**HR-MS** (ESI): [C<sub>40</sub>H<sub>62</sub>N<sub>8</sub>O<sub>11</sub>S+H]<sup>+</sup> calculated: 863.4332; found: 863.4325.

[C<sub>40</sub>H<sub>62</sub>N<sub>8</sub>O<sub>11</sub>S+Na]<sup>+</sup> calculated: 885.4151; found: 885.4132.

The spectroscopic data is in line with literature values.<sup>[18]</sup>

# <sup>1</sup>H-NMR:

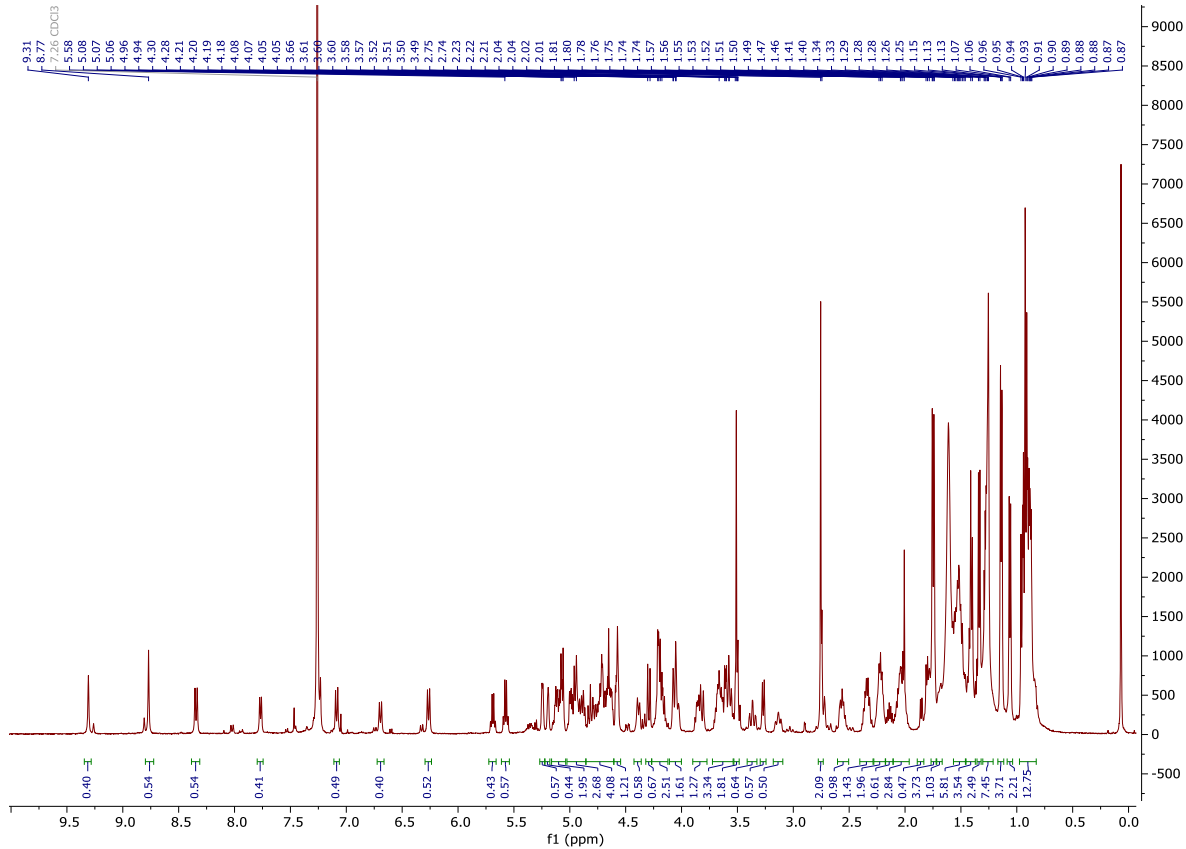

# <sup>13</sup>C-NMR:

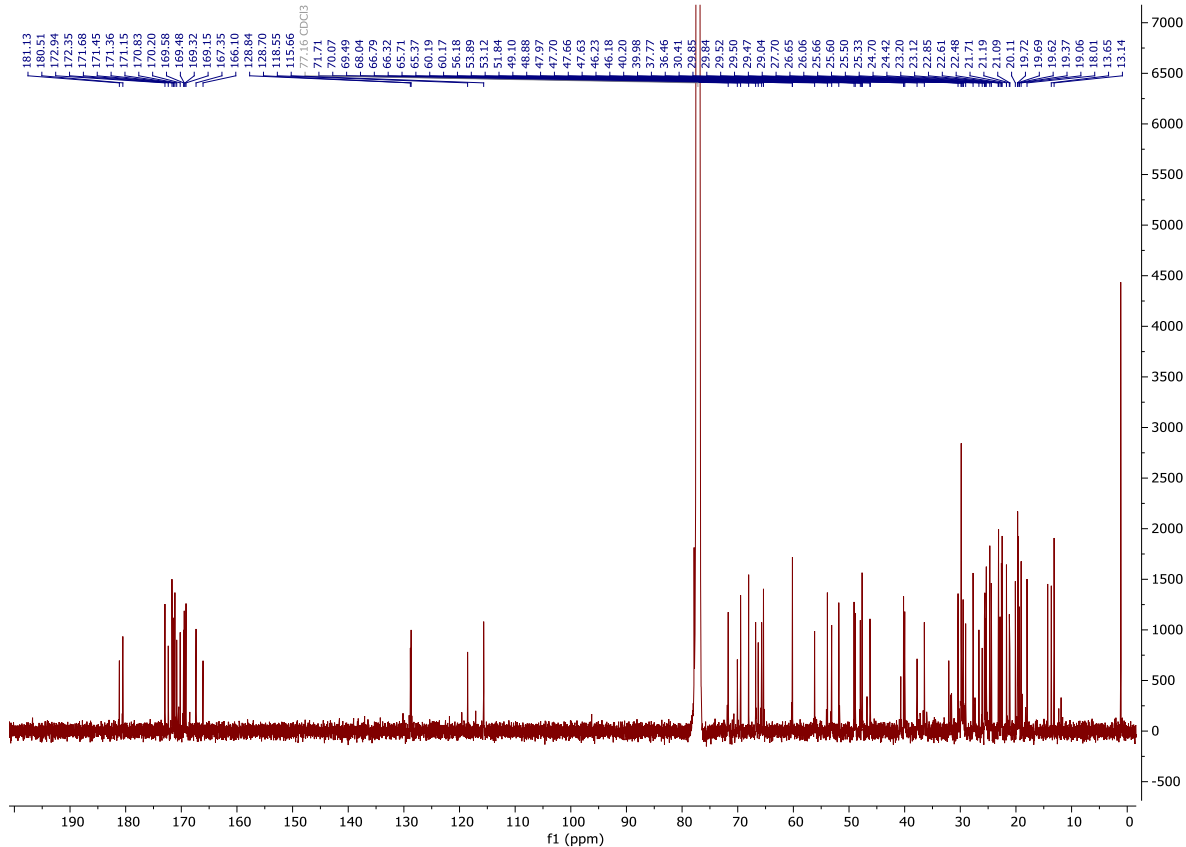

## *N*-Boc-*L*-ThioPro-*L*-Ser(*O*-TBS)-Gly-*O*-Me

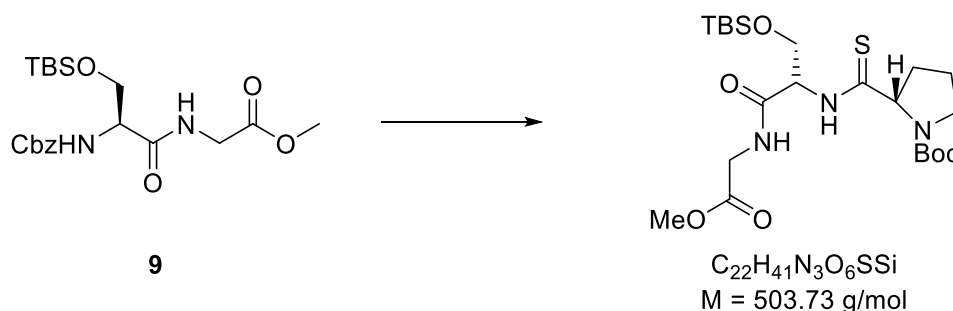

### Cbz deprotection:

To a solution of dipeptide **9** (2.00 g, 4.71 mmol, 1.00 equiv.) in MeOH (47 mL) and EtOAc (47 mL), palladium on activated carbon (10 wt% Pd, 200 mg) is added, and the argon atmosphere is replaced with a hydrogen atmosphere according to the general procedure. The suspension is stirred at room temperature for 26 hours, then the hydrogen balloon is removed, and the reaction solution is purged with argon for five minutes. Subsequently, the suspension is filtered over Celite, and the filter cake is washed with EtOAc (40 mL). The solvent is removed under reduced pressure, yielding a colorless solid (1.39 g), which is used in the next reaction without further purification.

### Thioacylation:

The colorless solid is dissolved in THF (11 mL), and at 0 °C, it is slowly treated with a solution of benzotriazole **10** (1.77 g, 4.71 mmol, 1.00 equiv.) in THF (5.5 mL). After stirring the reaction solution at this temperature for 30 minutes, the solvent is removed at room temperature under reduced pressure, and the residue is dissolved in Et<sub>2</sub>O (50 mL). The ethereal solution is washed with 10% citric acid solution (30 mL), with the washing solution back-extracted with Et<sub>2</sub>O (20 mL). The combined organic phases are washed with NaHCO<sub>3</sub> solution (2 × 30 mL), with the two basic washing solutions also combined and back-extracted with Et<sub>2</sub>O (20 mL). Subsequently, the combined organic phases are washed with NaCl solution (50 mL), dried over Na<sub>2</sub>SO<sub>4</sub>, and filtered. The solvent is removed under reduced pressure, and the crude product is purified by column chromatography (silica gel: Ø 5 cm, ↑ 20 cm, *n*-pentane/EtOAc = 4/1 → 3/1 → 2/1 → 1/1). This yields the tripeptide (1.74 g, 3.45 mmol, 73% over 2 steps) as a yellow solid.

**TLC:**  $R_f = 0.78$  (*n*-Pentane/EtOAc = 1/1) [UV, KMnO<sub>4</sub>].

**M.p.:** 72 °C.

**Specific rotation:**  $[\alpha]_D^{RT} = -72.0$  ( $c = 10.0$ , CHCl<sub>3</sub>).

**IR** (ATR):  $\tilde{\nu}$  (cm<sup>-1</sup>) = 3329 (m, OH), 2980 (m, -(CH<sub>2</sub>)-H), 1747 (s, C=O), 1672 (s, C=O), 1517 (s), 1394 (s, -(CH)-H), 1368 (m), 1210 (m), 1162 (m, C=O), 1129 (m), 840 (m), 778 (m).

**<sup>1</sup>H-NMR** (500 MHz, CDCl<sub>3</sub>, 300 K):  $\delta$  (ppm) = 8.54 (s, 1H, Ser NH), 7.34 (s, 1H, Gly NH), 5.16 (s, 1H, Ser CH), 4.76 (s, 1H, ThioPro CH), 4.36 (s, 1H, Ser CHH), 4.05 – 3.87 (m, 2H, Gly CH<sub>2</sub>), 3.78 – 3.61 (m, 4H, CO<sub>2</sub>CH<sub>3</sub>, Ser CHH), 3.54 – 3.46 (m, 2H, ThioPro NCH<sub>2</sub>), 2.41 – 2.33 (m, 1H, ThioPro CHCHH), 2.14 (ddt, <sup>2</sup>*J* = 12.6 Hz, <sup>3</sup>*J* = 6.7 Hz, <sup>3</sup>*J* = 5.2 Hz, 1H, ThioPro CHCHH), 1.93 – 1.76 (m, 2H, ThioPro CHCH<sub>2</sub>CH<sub>2</sub>), 1.43 [s, 9H, OC(CH<sub>3</sub>)<sub>2</sub>], 0.90 [s, 9H, SiC(CH<sub>3</sub>)<sub>3</sub>], 0.08 (s, 6H, SiCH<sub>3</sub>).

**<sup>13</sup>C-NMR** (126 MHz, CDCl<sub>3</sub>, 300 K):  $\delta$  (ppm) = 204.1 (s, NCS), 169.5 (s, Ser CO), 169.2 (s, Gly CO), 156.2 (s, NCO<sub>2</sub>), 81.6 [s, OC(CH<sub>3</sub>)<sub>3</sub>], 69.5 (d, ThioPro CH), 62.2 (t, Ser CH<sub>2</sub>), 58.8 (d, Ser CH), 52.2 (q, CO<sub>2</sub>CH<sub>3</sub>), 48.2 (t, ThioPro NCH<sub>2</sub>), 41.6 (t, Gly CH<sub>2</sub>), 33.6 (t, ThioPro CHCH<sub>2</sub>), 28.4 [q, OC(CH<sub>3</sub>)<sub>3</sub>], 25.9 [q, SiC(CH<sub>3</sub>)<sub>3</sub>], 24.5 (t, NCH<sub>2</sub>CH<sub>2</sub>), 18.3 [s, SiC(CH<sub>3</sub>)<sub>3</sub>], -5.3 (q, SiCH<sub>3</sub>), -5.6 (q, SiCH<sub>3</sub>).

**HR-MS** (ESI): [C<sub>22</sub>H<sub>41</sub>N<sub>3</sub>O<sub>6</sub>SSi+H]<sup>+</sup> calculated: 504.2558; found: 504.2554.

[C<sub>22</sub>H<sub>41</sub>N<sub>3</sub>O<sub>6</sub>SSi+Na]<sup>+</sup> calculated: 526.2377; found: 526.2374.

# <sup>1</sup>H-NMR:

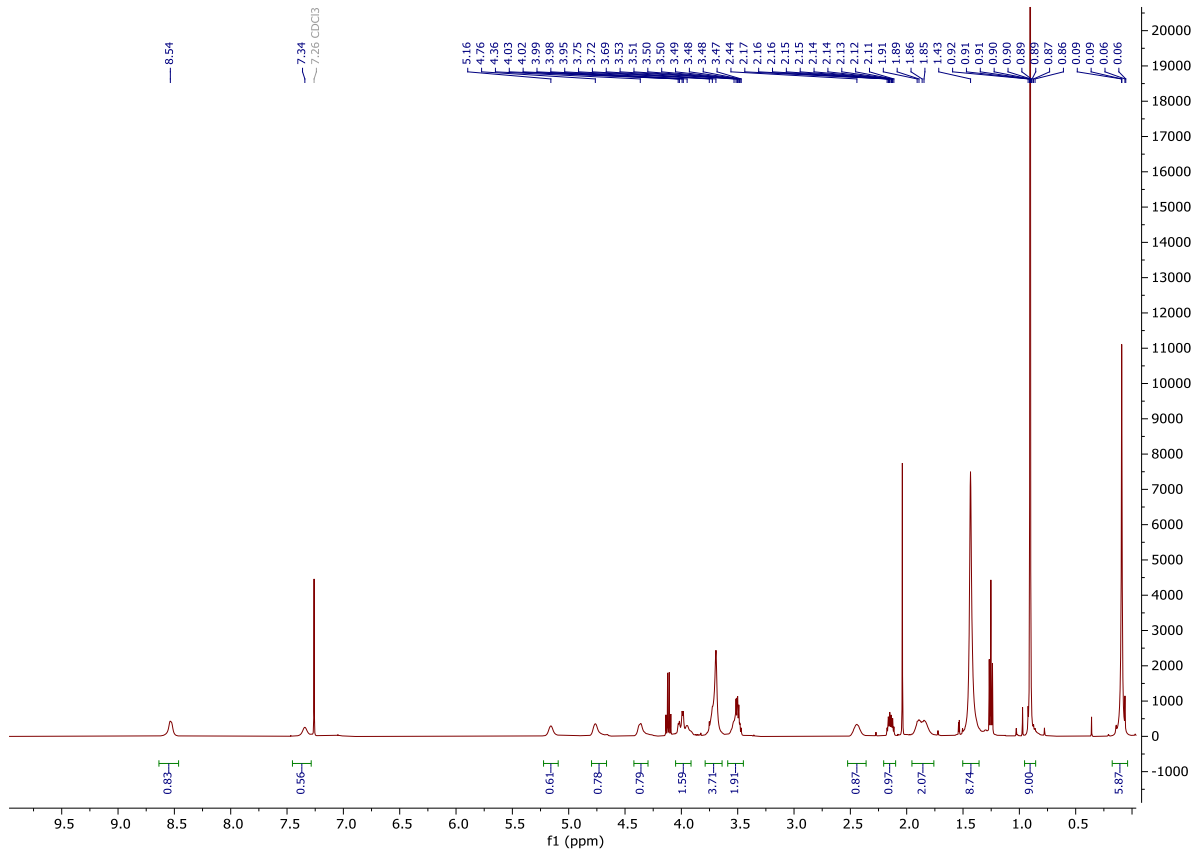

# <sup>13</sup>C-NMR:

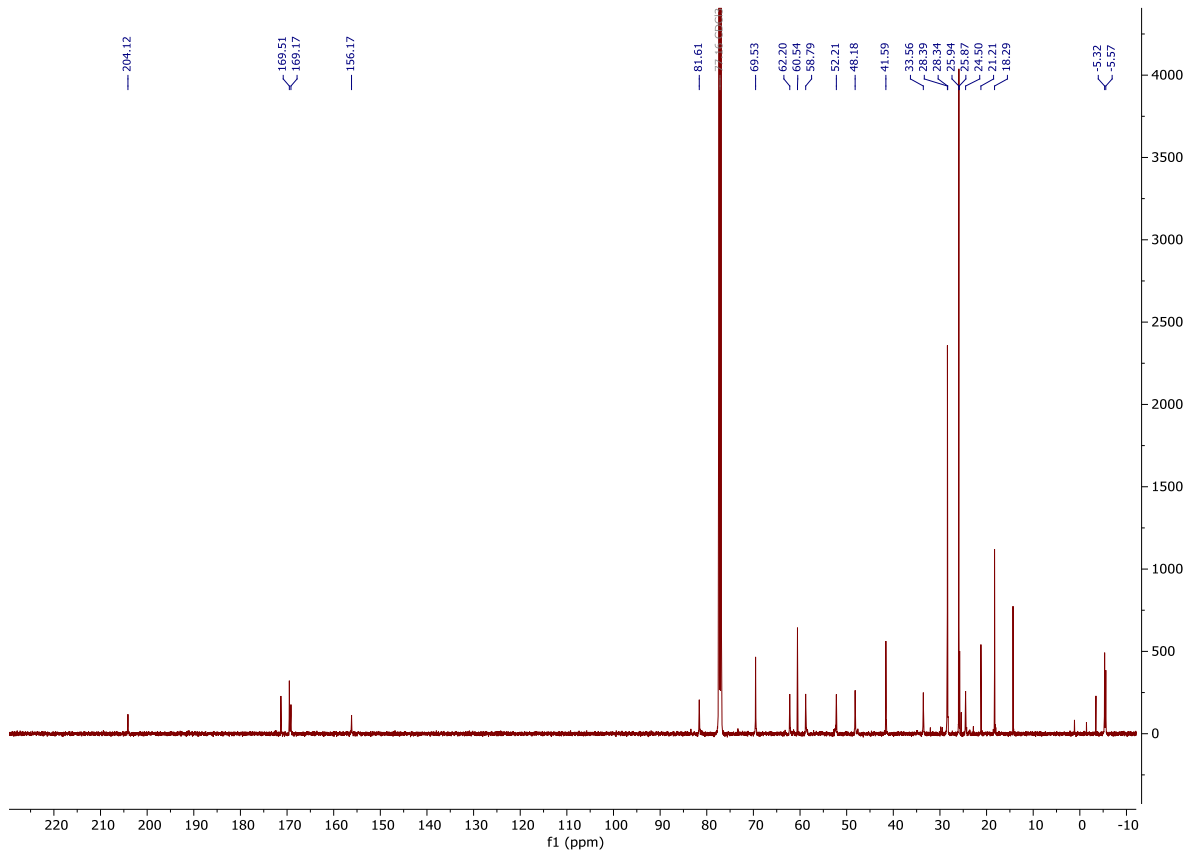

### *N*-Boc-L-Ala-D-Leu-L-ThioPro-L-Ser(*O*-TBS)-L-Sec(*Se*-Ph)-*O*-Me (13)

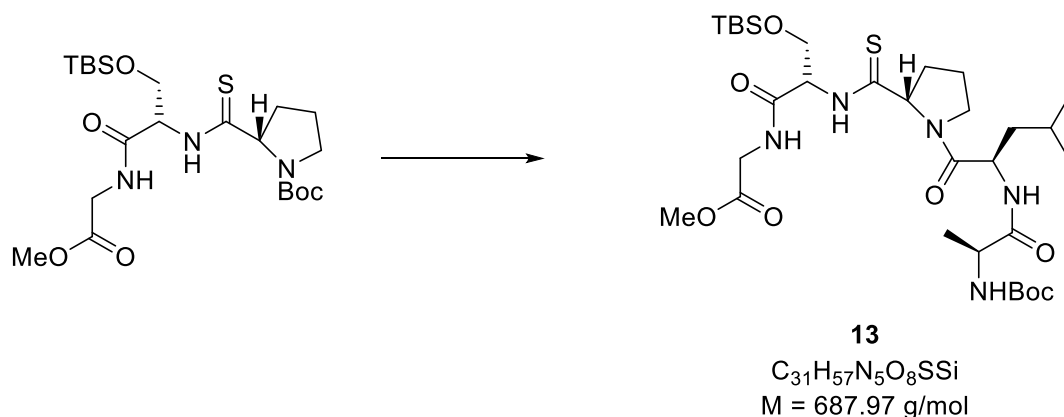

#### Boc deprotection:

A solution of tripeptide (1.81 g, 3.59 mmol, 1.00 equiv.) in CH<sub>2</sub>Cl<sub>2</sub> (40 mL) is slowly treated, one after another at 0 °C, with 2,6-lutidine (3.34 mL, 3.08 g, 28.8 mmol, 8.00 equiv.) and TMSOTf (3.10 mL, 3.81 g, 17.2 mmol, 4.77 equiv.). After stirring at 0 °C for six hours, the reaction is quenched by adding NaHCO<sub>3</sub> solution (40 mL), and the phases are separated. The aqueous phase is extracted with EtOAc (3 × 40 mL), and the combined organic phases are dried over Na<sub>2</sub>SO<sub>4</sub> and filtered. The solvent is removed under reduced pressure, and the residue is dried by azeotropic distillation (PhMe, 3 × 25 mL). As a result, the deprotected tripeptide (1.45 g) is obtained as a colorless solid, which is used in the subsequent reaction without further purification.

#### Peptide coupling:

The crude product and Ala-Leu dipeptide (1.19 g, 3.95 mmol, 1.10 equiv.) are dissolved in CH<sub>2</sub>Cl<sub>2</sub> (72 mL), and at 0 °C, they are incrementally treated with HATU (1.50 g, 3.95 mmol, 1.10 equiv.) and dropwise with 2,4,6-collidine (479 μL, 0.43 g, 3.59 mmol, 1.00 equiv.). After stirring the reaction solution at room temperature for 24 hours, the solvent is removed under reduced pressure, and the residue is treated with Et<sub>2</sub>O (50 mL). The resulting precipitate is filtered, and the filter cake is washed with Et<sub>2</sub>O (30 mL). Subsequently, the combined filtrates are washed with NaHCO<sub>3</sub> (40 mL) and NaCl solution (40 mL), dried over Na<sub>2</sub>SO<sub>4</sub>, filtered, and the solvent is removed under reduced pressure. The residue is purified by column

chromatography (silica gel: Ø 7 cm, ↓ 20 cm, CH<sub>2</sub>Cl<sub>2</sub>/MeOH = 99/1), yielding the pentapeptide **13** (1.47 g, 3.87 mmol, 98% over 2 steps) as a yellowish solid.

**TLC:**  $R_f = 0.30$  (*n*-Pentane/EtOAc = 1/1) [KMnO<sub>4</sub>].

**M.p.:** 76 °C.

**Specific rotation:**  $[\alpha]_D^{RT} = -20.0$  ( $c = 10.0$ , CHCl<sub>3</sub>).

**IR (ATR):**  $\tilde{\nu}$  (cm<sup>-1</sup>) = 3316 (m, OH), 2959 (m, -(CH<sub>2</sub>)-H), 2931 (m, -(CH<sub>2</sub>)-H), 1745 (s, C=O), 1652 (s, C=O), 1520 (s), 1451 (m), 1368 (m), 1247 (m), 1168 (m, C=O), 1065 (m), 859 (m), 759 (m).

**Rotamer ratio:** R1/R2 ≈ 88/12.

**<sup>1</sup>H-NMR** (500 MHz, CDCl<sub>3</sub>, 300 K):  $\delta$  (ppm) = 8.57 (d, <sup>3</sup>*J* = 7.4 Hz, 1H, Ser NH), 7.31 (s, 1H, Leu NH), 7.28 – 7.22 (m, 1H, Gly NH)\*, 6.15 (d, <sup>3</sup>*J* = 8.3 Hz, 1H, Ala NH), 5.19 – 5.13 (m, 1H, Ser CH), 4.93 (dd, <sup>3</sup>*J* = 8.7 Hz, <sup>3</sup>*J* = 3.7 Hz, 1H, ThioPro CH), 4.60 – 4.54 (m, 1H, Leu CH R2), 4.47 – 4.37 (m, 1H, Leu CH R1), 4.33 – 4.21 (m, 2H, Ala CH, Ser CHH), 4.19 (d, <sup>2</sup>*J* = 17.7 Hz, 1H, Gly CHH R2)<sup>◇</sup>, 4.16 (d, <sup>2</sup>*J* = 17.7 Hz, 1H, Gly CHH R1)<sup>◇</sup>, 4.10 – 4.02 (m, 2H, Ser CHH, ThioPro NCHH), 3.75 (s, 3H, CO<sub>2</sub>CH<sub>3</sub>), 3.71 (d, <sup>2</sup>*J* = 17.7 Hz, 1H, Gly CHH R2)<sup>◇</sup>, 3.67 (d, <sup>2</sup>*J* = 17.7 Hz, 1H, Gly CHH R1)<sup>◇</sup>, 3.65 – 3.55 (m, 1H, ThioPro NCHH), 2.45 – 2.35 (m, 1H, ThioPro CHCHH), 2.35 – 2.27 (m, 1H, ThioPro CHCHH), 2.04 – 1.91 (m, 2H, ThioPro CHCH<sub>2</sub>CH<sub>2</sub>), 1.73 – 1.63 [m, 1H, Leu CH(CH<sub>3</sub>)<sub>2</sub>], 1.62 – 1.47 (m, 2H, Leu CH<sub>2</sub>), 1.44 [s, 9H, OC(CH<sub>3</sub>)<sub>2</sub> R2]<sup>◇</sup>, 1.43 [s, 9H, OC(CH<sub>3</sub>)<sub>2</sub> R1]<sup>◇</sup>, 1.30 (d, <sup>3</sup>*J* = 7.1 Hz, 3H, Ala CH<sub>3</sub>), 1.00 – 0.93 (m, 6H, Leu CH<sub>3</sub>), 0.88 [s, 9H, SiC(CH<sub>3</sub>)<sub>3</sub> R1], 0.87 [s, 9H, SiC(CH<sub>3</sub>)<sub>3</sub> R2], 0.11 (s, 6H, SiCH<sub>3</sub>).

\* Signal and residual solvent proton signal overlap.

<sup>◇</sup> Signals overlap.

**<sup>13</sup>C-NMR** (126 MHz, CDCl<sub>3</sub>, 300 K):  $\delta$  (ppm) = 203.5 (s, NCS R1), 203.1 (s, NCS R2), 174.6 (s, Ala CO R2), 174.3 (s, Ala CO R1), 172.9 (s, Leu CO R2), 172.8 (s, Leu CO R1), 171.4 (s, Gly CO R2), 171.3 (s, Gly CO R1), 169.4 (s, Ser CO R1), 169.1 (s, Ser CO R2), 158.1 (s, NCO<sub>2</sub> R2), 156.9 (s, NCO<sub>2</sub> R1), 80.7 [s, OC(CH<sub>3</sub>)<sub>3</sub> R2], 80.4 [s, OC(CH<sub>3</sub>)<sub>3</sub> R1], 69.3 (d, ThioPro CH R1), 69.2 (d, ThioPro CH R2), 62.5 (t, Ser CH<sub>2</sub> R2), 61.8 (t, Ser CH<sub>2</sub> R1), 61.6 (d, Ser CH R2), 60.4 (d, Ser CH R1), 52.5 (q, CO<sub>2</sub>CH<sub>3</sub>), 50.5 (d, Ala CH R1), 49.8 (d, Ala CH R2), 49.1 (d,



Leu CH R1), 48.9 (d, Leu CH R2), 48.5 (t, ThioPro NCH<sub>2</sub> R2), 48.5 (t, ThioPro NCH<sub>2</sub> R1), 41.6 (t, Gly CH<sub>2</sub> R2), 41.2 (t, Gly CH<sub>2</sub> R1), 40.2 (t, Leu CH<sub>2</sub>), 33.2 (t, ThioPro CHCH<sub>2</sub> R1), 32.9 (t, ThioPro CHCH<sub>2</sub> R2), 28.4 [q, OC(CH<sub>3</sub>)<sub>3</sub> R1], 28.4 [q, OC(CH<sub>3</sub>)<sub>3</sub> R2], 25.9 [q, SiC(CH<sub>3</sub>)<sub>3</sub> R2], 25.8 [q, SiC(CH<sub>3</sub>)<sub>3</sub> R1], 24.9 [d, Leu CH(CH<sub>3</sub>)<sub>2</sub> R1], 24.8 [d, Leu CH(CH<sub>3</sub>)<sub>2</sub> R2], 24.5 (t, ThioPro NCH<sub>2</sub>CH<sub>2</sub> R1), 24.2 (t, ThioPro NCH<sub>2</sub>CH<sub>2</sub> R2), 23.5 (q, Leu CH<sub>3</sub> R1), 23.4 (q, Leu CH<sub>3</sub> R2), 22.2 (q, Leu CH<sub>3</sub> R1), 22.1 (q, Leu CH<sub>3</sub> R2), 18.3 [s, SiC(CH<sub>3</sub>)<sub>3</sub> R1], 18.1 [s, SiC(CH<sub>3</sub>)<sub>3</sub> R2], 17.1 (q, Ala CH<sub>3</sub> R2), 16.1 (q, Ala CH<sub>3</sub> R1), -3.5 (q, SiCH<sub>3</sub> R1), -3.5 (q, SiCH<sub>3</sub> R2), -5.2 (q, SiCH<sub>3</sub> R1), -5.3 (q, SiCH<sub>3</sub> R2).

**HR-MS (ESI):** [C<sub>31</sub>H<sub>57</sub>N<sub>5</sub>O<sub>8</sub>SSi+H]<sup>+</sup> calculated: 688.3770; found: 688.3760.

[C<sub>31</sub>H<sub>57</sub>N<sub>5</sub>O<sub>8</sub>SSi+Na]<sup>+</sup> calculated: 710.3589; found: 710.3576.

<sup>1</sup>H-NMR:

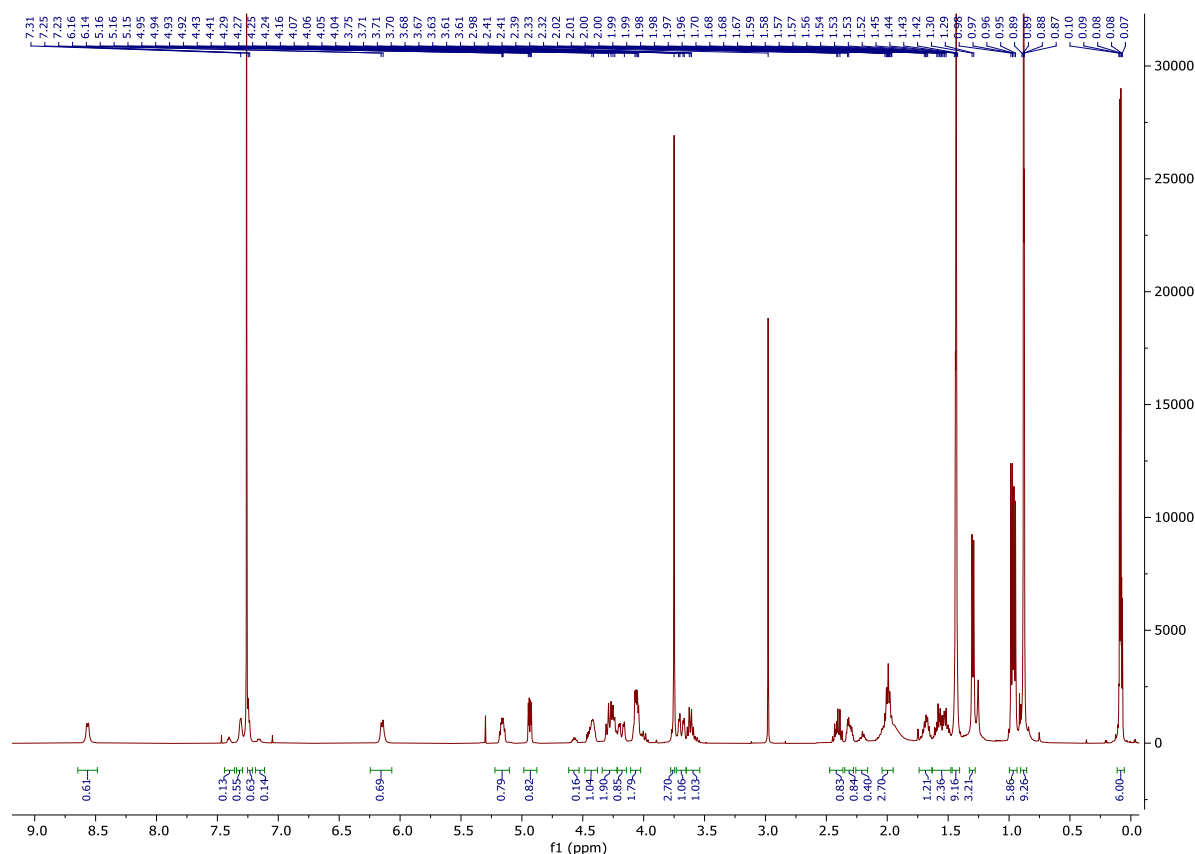

$^{13}\text{C}$ -NMR:

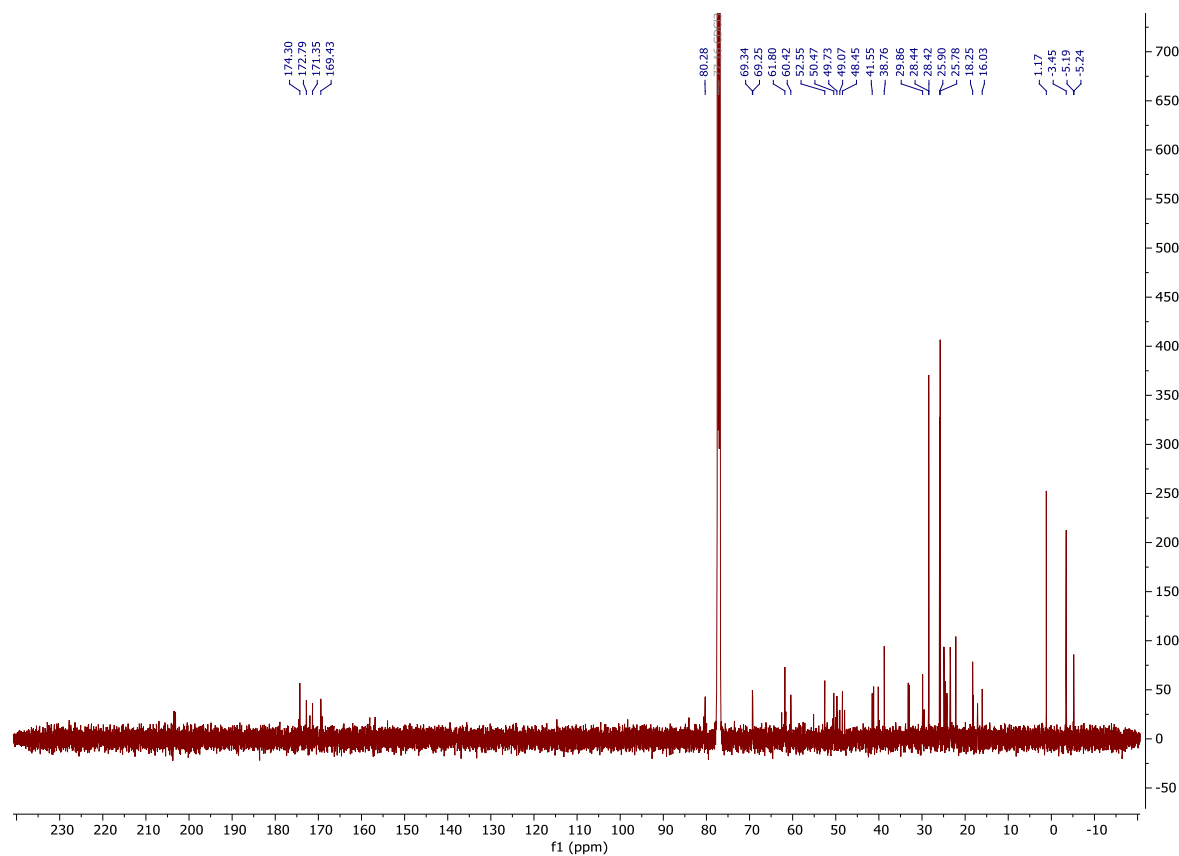

***N*-Boc-L-Ala-D-Leu-L-ThioPro-L-Ser(*O*-TBS)-Gly-L-Pip-L-Thr(*O*-TBS)-(N-Me)L-Val-L-Gls(*O*-TBS)-*O*-Me (15)**

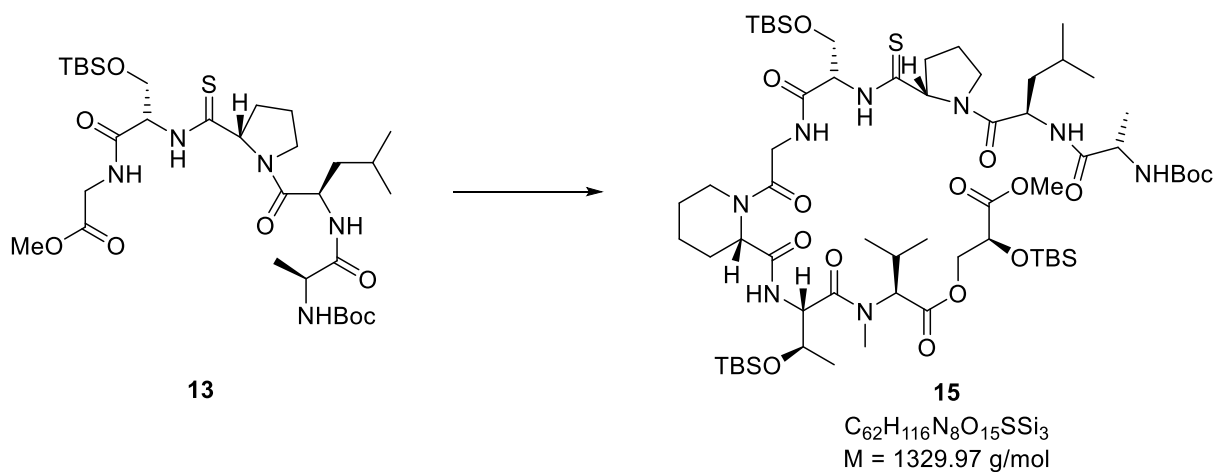

### Saponification:

To a solution of pentapeptide **13** (102 mg, 148  $\mu\text{mol}$ , 1.00 equiv.) in THF (2 mL) and water (0.4 mL),  $\text{LiOH}\cdot\text{H}_2\text{O}$  (15.5 mg, 370  $\mu\text{mol}$ , 2.50 equiv.) is added at 0 °C. The reaction solution is stirred at this temperature for six hours before terminating the reaction by adding water (15 mL) and  $\text{Et}_2\text{O}$  (10 mL). The phases are separated, and the organic phase is extracted with water (10 mL). The combined aqueous phases are adjusted to  $\text{pH} = 3$  using a 10% citric acid solution and extracted with  $\text{EtOAc}$  ( $3 \times 20$  mL). Subsequently, the combined organic phases are dried over  $\text{Na}_2\text{SO}_4$  and filtered. The solvent is removed under reduced pressure, and the residue is dried by azeotropic distillation ( $\text{PhMe}$ , 15 mL). As a result, the free carboxylic acid is obtained as a colorless solid, which is used in the following reaction without further purification.

### Esterification and Fragment Coupling:

The crude product is dissolved in  $\text{CH}_2\text{Cl}_2$  (1.2 mL) and initially treated with  $\text{C}_6\text{F}_5\text{OH}$  (35.5 mg, 193  $\mu\text{mol}$ , 1.30 equiv.) before  $\text{EDC}\cdot\text{HCl}$  (37.0 mg, 193  $\mu\text{mol}$ , 1.30 equiv.) is added dropwise at 0 °C. After stirring the suspension at this temperature for 30 minutes, it is gradually warmed to room temperature with stirring over 23 hours.

Subsequently, a solution of peptide **5** (110 mg, 163  $\mu\text{mol}$ , 1.10 equiv.) in  $\text{CH}_2\text{Cl}_2$  (1.8 mL) is slowly added to the reaction solution, followed by stirring for an additional 16 hours. The reaction is terminated by removing the solvent under reduced pressure. The residue is then purified by column chromatography (silica gel:  $\text{Ø}$  2 cm,  $\uparrow$  16 cm,  $n$  Pentane/ $\text{EtOAc} = 5/1 \rightarrow 4/1 \rightarrow 3/1 \rightarrow 2/1 \rightarrow 1/1$ ), yielding the nonapeptide **15** (105 mg, 78.9  $\mu\text{mol}$ , 53% over 3 steps) as a colorless solid.

**TLC:**  $R_f = 0.41$  ( $n$ -Pentan/ $\text{EtOAc} = 2/1$ ) [ $\text{KMnO}_4$ ].

**M.p.:** 92 °C.

**Specific rotation:**  $[\alpha]_D^{RT} = -76.0$  ( $c = 10.0$ ,  $\text{CHCl}_3$ ).

**IR (ATR):**  $\tilde{\nu}$  ( $\text{cm}^{-1}$ ) = 3311 (m, OH), 2955 (m,  $-(\text{CH}_2)\text{-H}$ ), 2931 (m,  $-(\text{CH}_2)\text{-H}$ ), 1744 (s, C=O), 1649 (s, C=O), 1513 (s), 1463 (m), 1364 (s,  $-(\text{CH})\text{-H}$ ), 1254 (m), 1163 (m, C=O), 1020 (m), 838 (m), 780 (m).

**Rotamer ratio:** R1/R2  $\approx$  84/16.

**<sup>1</sup>H-NMR** (500 MHz, CDCl<sub>3</sub>, 300 K):  $\delta$  (ppm) = 8.56 (d, <sup>3</sup>*J* = 7.1 Hz, 1H, Ser NH), 7.32 – 7.26 (m, 1H, Leu NH)\*, 7.22 – 7.14 (m, 1H, Gly NH), 6.74 (d, <sup>3</sup>*J* = 8.2 Hz, 1H, Thr NH), 6.59 (d, <sup>3</sup>*J* = 8.9 Hz, 1H, Ala NH), 5.23 (s, 1H, Pip CH R1), 5.20 – 5.14 (m, 1H, Ser CH R2), 5.13 – 5.07 (m, 1H, Ser CH R1), 5.00 – 4.91 (m, 2H, ThioPro CH, Thr CHOH), 4.82 – 4.73 (m, 1H, Thr CHNH R1), 4.76 – 4.71 (m, 1H Thr CHNH R2), 4.58 – 4.48 (m, 5H, Pip CH R2, Leu CH R1, Glc CHH, Glc CH R2, Gly CHH R2), 4.44 – 4.40 (m, 1H, Leu CH R2), 4.39 – 4.35 (m, 1H, Glc CH R1), 4.31 – 4.15 (m, 3H, Gly CHH R1, Ser CHH, Ala CH), 4.13 – 4.08 (m, 2H, Val CH, Glc CHH), 4.05 – 3.95 (m, 2H, ThioPro NCHH, Ser CHH), 3.94 – 3.86 (m, 1H, Gly CHH), 3.72 (s, 3H, CO<sub>2</sub>CH<sub>3</sub>), 3.67 – 3.52 (m, 2H, ThioPro NCHH, Pip NCHH), 3.33 – 3.26 (m, 1H, Pip NCHH), 3.10 (s, 3H, Val NCH<sub>3</sub>), 2.43 – 2.22 (m, 3H, ThioPro CHCH<sub>2</sub>, Pip CHCHH R2), 2.21 – 2.09 [m, 2H, Pip CHCHH R1, Val CH(CH<sub>3</sub>)<sub>2</sub>], 2.02 – 1.91 (m, 2H, ThioPro NCH<sub>2</sub>CH<sub>2</sub>), 1.75 – 1.48 (m, 7H, Leu CH<sub>2</sub>, Pip CHCHHCH<sub>2</sub>, Pip NCH<sub>2</sub>CH<sub>2</sub>), 1.42 [s, 10H, CH(CH<sub>3</sub>)<sub>2</sub>, OC(CH<sub>3</sub>)<sub>3</sub>], 1.33 – 1.27 (m, 3H, Ala CH<sub>3</sub>), 1.20 – 1.14 (m, 3H, Thr CH<sub>3</sub>), 1.01 – 0.91 (m, 9H, Val CH<sub>3</sub>, 2 x Leu CH<sub>3</sub>), 0.91 – 0.78 [m, 30H, 3 x SiC(CH<sub>3</sub>)<sub>3</sub>, Val CH<sub>3</sub>], 0.10 – 0.06 (m, 12H, 4 x SiCH<sub>3</sub>), 0.04 – 0.01 (m, 6H, 2 x SiCH<sub>3</sub>).

\* Signal and residual solvent proton signal overlap.

**<sup>13</sup>C-NMR** (126 MHz, CDCl<sub>3</sub>, 300 K):  $\delta$  (ppm) = 203.3 (s, NCS R1), 203.2 (s, NCS R2), 174.3 (s, Ala CO R1), 174.1 (s, Ala CO R2), 172.8 (s, Thr CO R2), 172.7 (s, Thr CO R1), 172.3 (s, Pip CO R2), 172.2 (s, Pip CO R1), 171.2 (s, Leu CO R1)\*, 171.1 (s, Leu CO R2)\*, 170.8 (s, Glc CO R1)\*, 170.7 (s, Glc CO R2)\*, 170.2 (s, Ser CO R1)\*, 170.1 (s, Ser CO R2)\*, 169.2 (s, Gly CO R2)\*, 168.6 (s, Gly CO R1)\*, 168.5 (s, Val CO R2)\*, 168.2 (s, Val CO R1)\*, 156.5 (s, NCO<sub>2</sub> R1), 156.4 (s, NCO<sub>2</sub> R2), 80.2 [s, OC(CH<sub>3</sub>)<sub>3</sub> R2], 79.9 [s, OC(CH<sub>3</sub>)<sub>3</sub> R1], 70.6 (d, Glc CH R1), 69.7 (d, Glc CH R2), 69.1 (d, Thr CHOH R2), 68.9 (d, Thr CHOH R1), 68.7 (d, Val NMeCH R2), 68.5 (d, Val NMeCH R1), 66.2 (t, Glc CH<sub>2</sub> R2), 66.1 (t, Glc CH<sub>2</sub> R1), 61.9 (t, Ser CH<sub>2</sub> R1), 61.8 (t, Ser CH<sub>2</sub> R2), 61.6 (d, ThioPro CH R1), 61.5 (d, Ser CH R1), 61.3 (d, ThioPro CH R2), 60.7 (d, Ser CH R2), 55.3 (d, Thr CHNH R2), 54.9 (d, Thr CHNH R1), 53.1 (d, Pip CH R2), 52.8 (d, Pip CH R1), 52.3 (q, CO<sub>2</sub>CH<sub>3</sub>), 50.0 (s, Leu CH R1), 49.9 (s, Leu CH R2), 49.5 (d, Ala CH R1), 49.4 (d, Ala CH R2), 48.3 (t, ThioPro NCH<sub>2</sub> R2), 48.1 (t, ThioPro NCH<sub>2</sub> R1), 43.6 (t, Pip NCH<sub>2</sub> R2), 43.3 (t, Pip NCH<sub>2</sub> R1), 41.6 (t, Gly CH<sub>2</sub> R1), 41.1 (t, Gly CH<sub>2</sub> R2), 40.4 (t, Leu CH<sub>2</sub> R2), 40.3 (t, Leu CH<sub>2</sub> R1), 33.2 (t, ThioPro CHCH<sub>2</sub> R1), 32.9 (t, ThioPro CHCH<sub>2</sub> R2), 31.9 (q, Val NCH<sub>3</sub> R2), 31.7 (q, Val NCH<sub>3</sub> R1), 28.5 [q, OC(CH<sub>3</sub>)<sub>3</sub> R1], 28.4 [q, OC(CH<sub>3</sub>)<sub>3</sub> R2], 27.9 [d, Val CH(CH<sub>3</sub>)<sub>2</sub> R2], 27.8 [d, Val CH(CH<sub>3</sub>)<sub>2</sub> R1], 25.9 [q, SiC(CH<sub>3</sub>)<sub>3</sub> R1],

25.9 [q, SiC(CH<sub>3</sub>)<sub>3</sub> R2], 25.9 [q, SiC(CH<sub>3</sub>)<sub>3</sub> R1]\*, 25.8 [q, SiC(CH<sub>3</sub>)<sub>3</sub> R2], 25.8 (t, Pip CHCH<sub>2</sub>CH<sub>2</sub> R1)\*, 25.7 [q, SiC(CH<sub>3</sub>)<sub>3</sub>], 25.4 (t, Pip CHCH<sub>2</sub>CH<sub>2</sub> R1), 25.3 (t, Pip CHCH<sub>2</sub> R2), 24.8 (Pip CHCH<sub>2</sub> R1), 24.6 [d, Leu CH(CH<sub>3</sub>)<sub>2</sub> R2], 24.4 (t, ThioPro NCH<sub>2</sub>CH<sub>2</sub> R2), 24.3 [d, Leu CH(CH<sub>3</sub>)<sub>2</sub> R1], 24.2 (t, ThioPro NCH<sub>2</sub>CH<sub>2</sub> R1), 23.4 (q, Leu CH<sub>3</sub> R1), 23.3 (q, Leu CH<sub>3</sub> R2), 22.2 (q, Leu CH<sub>3</sub> R2), 22.1 (q, Leu CH<sub>3</sub> R1), 21.3 (q, Thr CH<sub>3</sub> R1), 21.2 (q, Thr CH<sub>3</sub> R2), 20.5 (Pip NCH<sub>2</sub>CH<sub>2</sub> R2), 20.4 (Pip NCH<sub>2</sub>CH<sub>2</sub> R1), 19.7 (q, Val CH<sub>3</sub> R1), 19.7 (q, Val CH<sub>3</sub> R2), 19.2 (q, Val CH<sub>3</sub> R1), 19.1 (q, Val CH<sub>3</sub> R2), 18.3 [s, SiC(CH<sub>3</sub>)<sub>3</sub> R1], 18.3 [s, SiC(CH<sub>3</sub>)<sub>3</sub> R1], 18.2 [s, SiC(CH<sub>3</sub>)<sub>3</sub> R2], 18.1 [s, SiC(CH<sub>3</sub>)<sub>3</sub> R2], 18.0 [s, SiC(CH<sub>3</sub>)<sub>3</sub> R1], 18.0 [s, SiC(CH<sub>3</sub>)<sub>3</sub> R2], 17.2 (q, Ala CH<sub>3</sub> R2), 16.7 (q, Ala CH<sub>3</sub> R1), -3.5 (q, SiCH<sub>3</sub> R1), -4.6 (q, SiCH<sub>3</sub> R2), -5.0 (q, SiCH<sub>3</sub> R1), -5.2 (q, SiCH<sub>3</sub> R2), -5.3 (q, SiCH<sub>3</sub> R2), -5.3 (q, SiCH<sub>3</sub> R1).

\*/\*/\* Assignment interchangeable.

**HR-MS (ESI):** [C<sub>62</sub>H<sub>116</sub>N<sub>8</sub>O<sub>15</sub>SSi<sub>3</sub>+H]<sup>+</sup> calculated: 1329.7662; found: 1329.7636.

[C<sub>62</sub>H<sub>116</sub>N<sub>8</sub>O<sub>15</sub>SSi<sub>3</sub>+Na]<sup>+</sup> calculated: 1351.7481; found: 1351.7448.

<sup>1</sup>H-NMR:

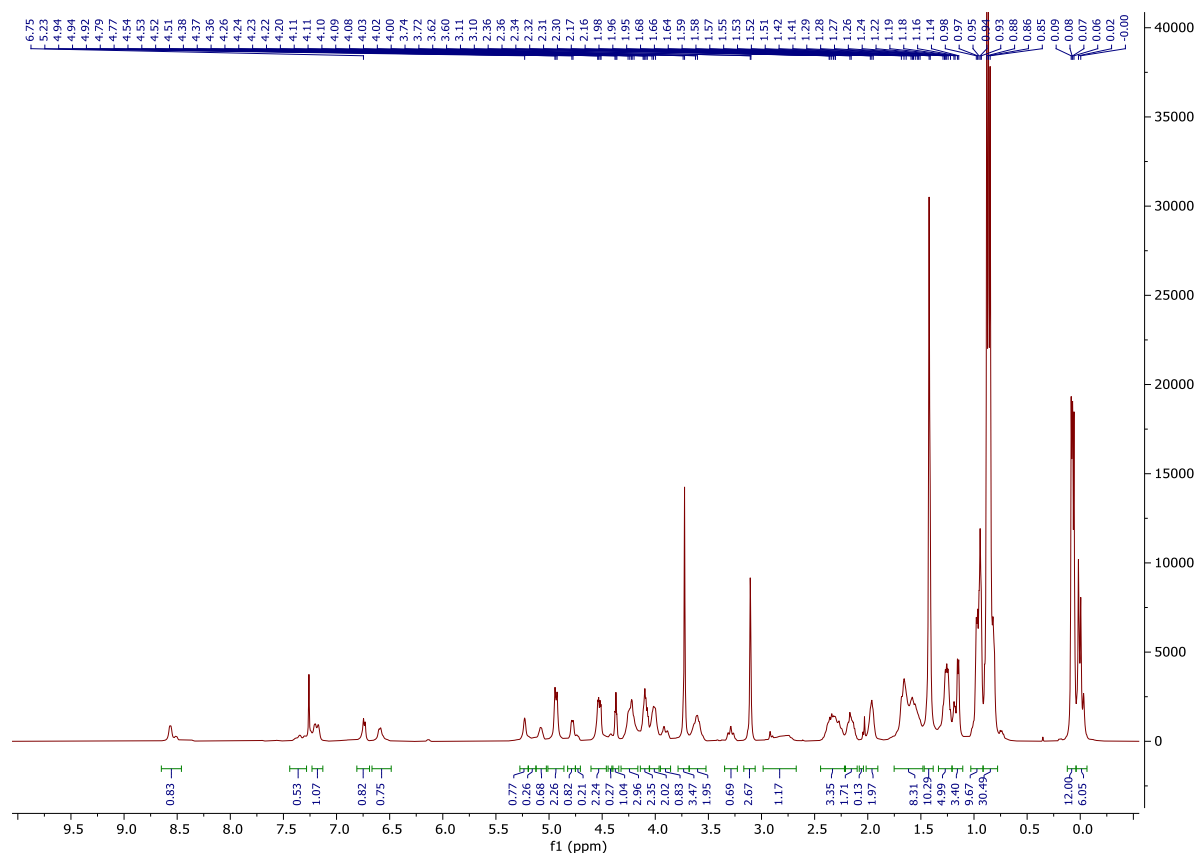

<sup>13</sup>C-NMR:

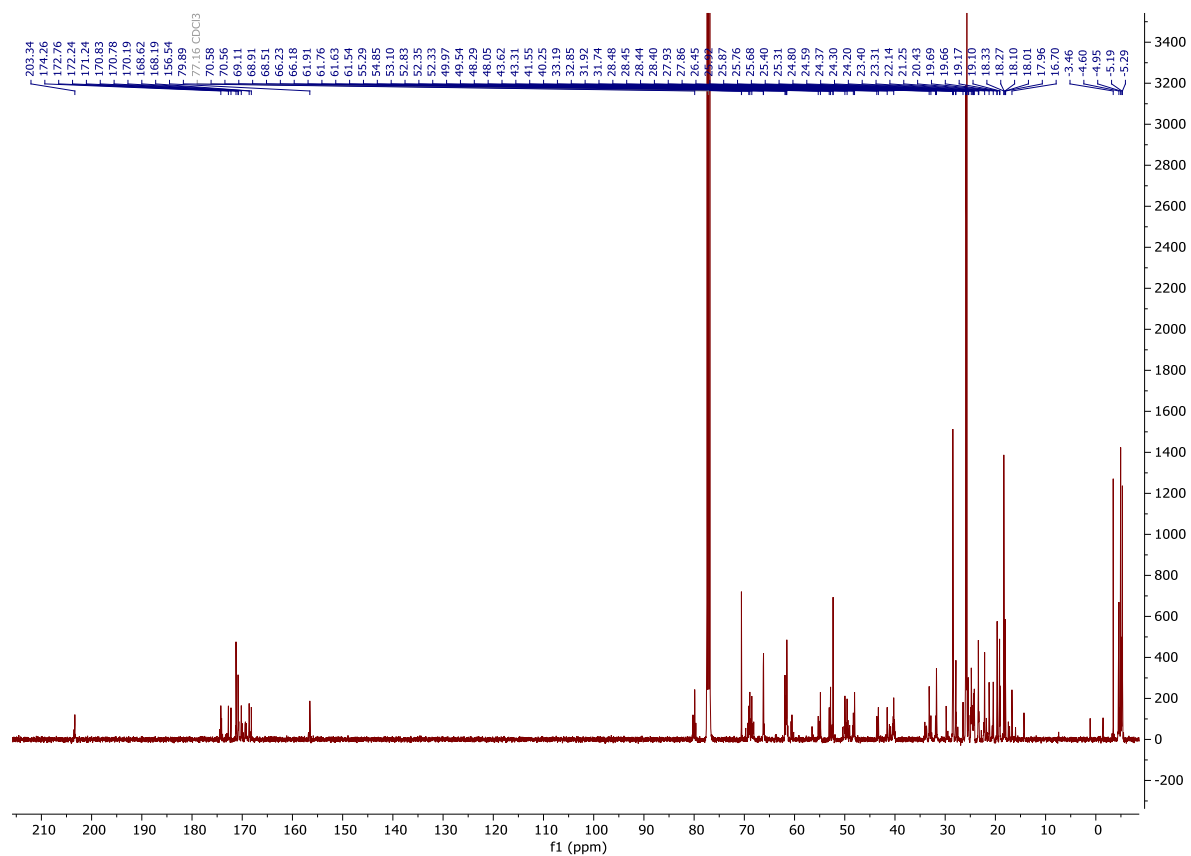

## Macrocycle 16

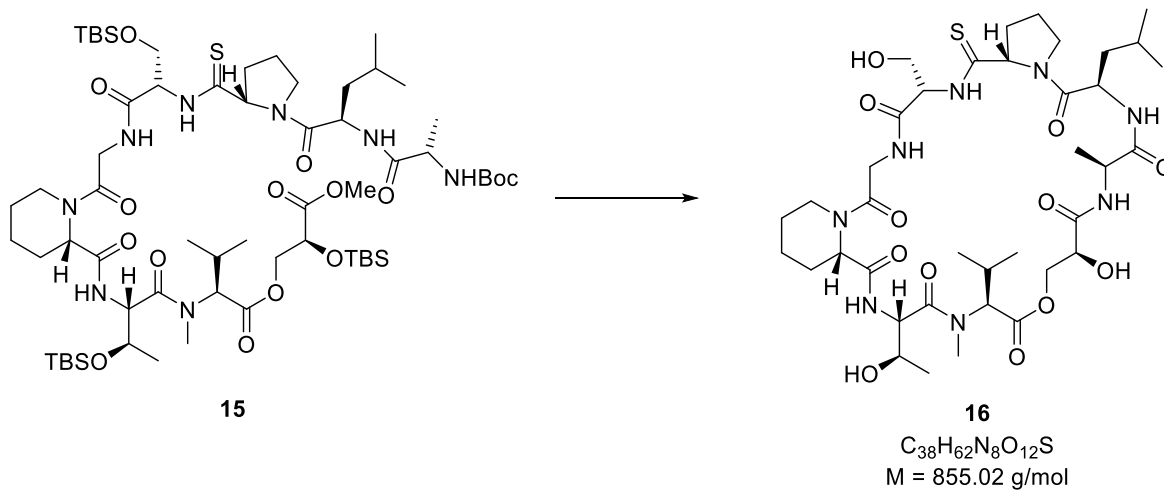

### Ester Cleavage:

A solution of nonapeptide **15** (409 mg, 308  $\mu\text{mol}$ , 1.00 equiv.) in DCE (34 mL) is treated with  $\text{Me}_3\text{SnOH}$  (357 mg, 1.98 mmol, 8.00 equiv.) and the reaction mixture is stirred at 80 °C for 48 hours. Subsequently, the mixture is cooled to room temperature, and 5% citric acid solution (20 mL) is added. The emulsion is stirred for 15 minutes, the resulting phases are separated, and the aqueous phase is extracted with EtOAc ( $2 \times 30$  mL). The combined organic phases are washed with 5% citric acid solution ( $2 \times 20$  mL), and the combined wash solutions are back-extracted with EtOAc (20 mL). Then, the combined organic phases are washed with NaCl solution (20 mL), dried over  $\text{Na}_2\text{SO}_4$ , and filtered. The residue is purified by column chromatography (silica gel:  $\varnothing$  2 cm,  $\uparrow$  16 cm,  $\text{CH}_2\text{Cl}_2/\text{MeOH}/\text{AcOH} = 100/1/0.01 \rightarrow 75/1/0.01 \rightarrow 50/1/0.01 \rightarrow 25/1/0.01$ ) to remove residual tin reagent. A colorless solid (414 mg) is obtained.

### Boc Deprotection:

The obtained solid is dissolved in  $\text{CH}_2\text{Cl}_2$  (20 mL) and cooled to 0 °C, then treated with TFA (5 mL). The solution is stirred at this temperature for three hours. After the addition of water (20 mL), the aqueous phase is adjusted to pH = 7 using 1 M sodium hydroxide and  $\text{NaHCO}_3$  solution. The phases are separated, and the aqueous phase is saturated with solid NaCl and extracted with EtOAc ( $2 \times 60$  mL). The combined organic phases are washed with NaCl solution (50 mL), dried over  $\text{Na}_2\text{SO}_4$ , and filtered before removing the solvent under reduced pressure. The residue is then dried by azeotropic distillation with PhMe ( $2 \times 20$  mL). The resulting yellowish solid (207 mg) is used in the subsequent reaction without further purification.

### Macrolactamization:

A solution of the yellowish solid in  $\text{CH}_2\text{Cl}_2$  (15 mL) is slowly added dropwise over four hours to a solution of HATU (320 mg, 843  $\mu\text{mol}$ , 2.74 eq.) and 2,4,6 Collidin (179  $\mu\text{L}$ , 163 mg, 1.35 mmol, 4.38 eq.) in  $\text{CH}_2\text{Cl}_2$  (120 mL). The reaction solution is stirred for 18 hours before adding water (70 mL). The phases are separated, the aqueous phase is saturated with solid NaCl, and extracted with  $\text{CH}_2\text{Cl}_2$  ( $2 \times 50$  mL). The combined organic phases are washed with 10% citric acid solution (70 mL),  $\text{NaHCO}_3$  (70 mL), and NaCl solution (70 mL), and the washing

solutions are counter-extracted with CH<sub>2</sub>Cl<sub>2</sub> (each 10 mL). Subsequently, the combined organic phases are dried over Na<sub>2</sub>SO<sub>4</sub>, filtered, and the solvent is removed under reduced pressure. The residue is dissolved in dry MeCN (20 mL) and filtered through Celite to remove inorganic salts. After washing the filter cake several times with MeCN, the solvent is removed under reduced pressure from the combined filtrates. The resulting yellowish resin (216 mg) is used in the following reaction without further purification.

#### TBS Deprotection:

A solution of the yellowish resin in dry MeCN (45 mL) is carefully treated with HF (48% in water, 2.45 mL), and the reaction solution is stirred at room temperature for 26 hours. The reaction is quenched by adding Na<sub>2</sub>CO<sub>3</sub> solution (50 mL), and the aqueous phase is extracted with EtOAc (3 × 50 mL). The combined organic phases are washed with NaCl solution (100 mL), dried over Na<sub>2</sub>SO<sub>4</sub>, and filtered before most of the solvent is removed under reduced pressure. Before complete solvent removal, Celite is added. The Celite loaded with the crude product is purified by column chromatography (silica gel: Ø 2 cm, ↑ 22 cm, CH<sub>2</sub>Cl<sub>2</sub>/MeOH = 50/1 → 40/1 → 30/1 → 20/1 → 10/1), yielding approximately 93 mg of a colorless solid that is still impure. This is further purified by semi-preparative HPLC (Phenomenex Luna 5u Silica, 20 × 250 mm, <sup>i</sup>PrOH/*n*-Heptane = 20/80, r.t., 15 mL·min<sup>-1</sup>, 215 nm, t<sub>R</sub> (**16**) = 30.3 min, injection concentration: 93 mg·mL<sup>-1</sup>). After lyophilization (with ultra-pure water), macrocycle **16** (30.9 mg, 36.1 μmol, 12% over 4 steps) is obtained as an amorphous, colorless solid.

**TLC:** R<sub>f</sub> = 0.41 (CH<sub>2</sub>Cl<sub>2</sub>/MeOH = 9/1) [UV, KMnO<sub>4</sub>].

**M.p.:** 171 °C.

**Specific rotation:**  $[\alpha]_D^{RT} = -76.0$  (*c* = 10.0, CHCl<sub>3</sub>).

**IR** (ATR):  $\tilde{\nu}$  (cm<sup>-1</sup>) = 3325 (m, OH), 2959 (m, -(CH<sub>2</sub>)-H), 1742 (s, C=O), 1637 (s, C=O), 1515 (s), 1446 (m), 1262 (m), 1193 (m), 1149 (m, C=O), 1123 (m), 1063 (m), 1018 (m), 753 (m), 666 (m).

**Rotamer ratio:** R1/R2 ≈ 59/41.

**<sup>1</sup>H-NMR** (500 MHz, CDCl<sub>3</sub>, 298 K): δ (ppm) = 8.49 (d, <sup>3</sup>J = 7.9 Hz, 1H, Ser NH R2), 8.26 (s, 1H, Ser NH R1), 7.89 (t, <sup>3</sup>J = 5.9 Hz, 1H, Gly NH R1), 7.74 (d, <sup>3</sup>J = 8.7 Hz, Leu NH R1), 7.66



(s, 1H, Ala NH R2), 7.52 (d,  $^3J = 9.2$  Hz, 1H, Ala NH R1), 7.35 (s, 1H, Gly NH R2), 7.17 – 7.11 (m, 1H, Thr NH R2), 7.06 (d,  $^3J = 8.4$  Hz, 1H, Thr NH R1) $^\diamond$ , 7.09 – 7.02 (m, 1H, Leu NH R2) $^\diamond$ , 5.38 (s, 1H, Pip CH R2), 5.20 (d,  $^3J = 5.5$  Hz, 1H, Pip CH R1), 5.17 – 5.11 (m, 1H, Ser CH R2), 5.08 – 5.03 (m, 1H, Ser CH R1), 5.03 – 5.00 (m, 1H, Ala CH R1), 4.97 (d,  $^3J = 8.8$  Hz,  $^3J = 4.9$  Hz, 1H, ThioPro CH R1), 4.87 (d,  $^3J = 8.8$  Hz, 1H, Thr CHNH R2), 4.80 (dd,  $^3J = 11.6$  Hz,  $^3J = 3.8$  Hz, 1H, Gls CHH R1), 4.79 (dd,  $^2J = 15.9$  Hz,  $^3J = 5.9$  Hz, Gly CHH R1), 4.68 – 4.62 (m, 1H, Ala CH R1), 4.61 – 4.57 (m, 1H, Gly CHH R2), 4.55 (dd,  $^3J = 8.4$  Hz,  $^3J = 1.9$  Hz, 1H, Thr CHNH R1), 4.50 (s, 1H, Gls CH R2), 4.46 – 4.39 (m, 1H, Val CH R2), 4.36 (dd,  $^3J = 11.5$  Hz,  $^3J = 5.7$  Hz, 1H, Ser CHH), 4.34 – 4.29 (m, 1H, Gls CH R1), 4.28 – 4.21 (m, 1H, Val CH R1), 4.13 – 3.99 (m, 4H, ThioPro NCHH, Pip NCHH, Gls CHH, Thr CHOH), 3.91 – 3.84 (m, 1H, Ser CHH R2), 3.79 – 3.70 (m, 1H, ThioPro NCHH), 3.61 – 3.54 (m, 1H, Ser CHH R1), 3.50 (dd,  $^2J = 15.9$  Hz,  $^3J = 5.0$  Hz, Gly CHH), 3.29 – 3.21 (m, 1H, Pip NCHH R2), 3.15 (td,  $^2J = 13.4$  Hz,  $^3J = 2.6$  Hz, Pip NCHH R1), 3.07 (s, 3H, CO<sub>2</sub>CH<sub>3</sub> R1), 2.77 (s, 3H, CO<sub>2</sub>CH<sub>3</sub> R2), 2.52 – 2.37 (m, 1H, ThioPro CHCHH), 2.36 – 2.25 [m, 3H, Val CH(CH<sub>3</sub>)<sub>2</sub>, Pip CHCH<sub>2</sub>], 2.25 – 2.16 (m, 1H, ThioPro CHCHH), 2.06 – 1.98 (m, 2H, ThioPro NCH<sub>2</sub>CH<sub>2</sub>), 1.85 – 1.66 (m, 4H, Leu CHH, Pip NCH<sub>2</sub>CH<sub>2</sub>, Pip CHCH<sub>2</sub>CHH), 1.64 (d,  $^3J = 7.0$  Hz, 3H, Ala CH<sub>3</sub> R1), 1.59 – 1.40 (m, 3H, Leu CHHCH(CH<sub>3</sub>)<sub>2</sub>, Pip CHCH<sub>2</sub>CHH), 1.35 – 1.29 (m, 3H, Ala CH<sub>3</sub> R2), 1.28 – 1.22 (m, 3H, Thr CH<sub>3</sub> R1), 1.17 (d,  $^3J = 6.3$  Hz, 3H, Thr CH<sub>3</sub> R2), 1.08 (d,  $^3J = 6.6$  Hz, 3H, Val CHCH<sub>3</sub>CH<sub>3</sub> R2), 0.99 (d,  $^3J = 6.5$  Hz, 3H, Val CHCH<sub>3</sub>CH<sub>3</sub> R1), 0.95 – 0.81 [m, 9H, Val CHCH<sub>3</sub>CH<sub>3</sub>, Leu CH(CH<sub>3</sub>)<sub>2</sub>].

$^\diamond$ Signals overlap.

**<sup>13</sup>C-NMR** (126 MHz, CDCl<sub>3</sub>, 300 K):  $\delta$  (ppm) = 204.1 (s, CS R2), 203.4 (s, CS R1), 173.8 (s, Ala CO R1), 173.3 (s, Ala CO R2), 173.1 (s, Leu CO R2), 172.9 (s, Leu CO R1), 171.7 (s, Pip CO R2) $^\clubsuit$ , 171.5 (s, Pip CO R1) $^\clubsuit$ , 171.4 (s, Thr CO) $^\clubsuit$ , 171.0 (s, Gls CO) $^\clubsuit$ , 170.9 (s, Val CO) $^\clubsuit$ , 170.8 (s, Gly CO R1) $^\clubsuit$ , 170.4 (s, Gly CO R2) $^\clubsuit$ , 169.3 (s, Ser CO), 71.0 (d, Gls CH R1), 70.6 (d, Gls CH R2), 69.6 (d, ThioPro CH R1), 68.9 (d, ThioPro CH R2), 67.8 (d, Thr CHOH R2), 67.0 (t, Gls CH<sub>2</sub> R2), 66.3 (t, Gls CH<sub>2</sub> R1), 65.6 (d, Thr CHOH R1), 65.6 (d, Val NMeCH R2), 64.5 (d, Val NMeCH R1), 62.3 (t, Ser CH<sub>2</sub> R2), 60.9 (d, Ser CH<sub>2</sub> R1), 59.9 (t, Ser CH), 55.5 (d, Thr CHNH R1), 53.5 (d, Pip CH R2), 53.0 (d, Pip CH R1), 52.0 (d, Thr CHNH R2), 50.4 (d, Leu CHNH R2), 49.2 (d, Leu CHNH R1), 48.8 (t, ThioPro NCH<sub>2</sub>), 48.6 (d, Ala CH), 48.4 (d, ThioPro NCH<sub>2</sub> R2), 44.5 (t, Pip NCH<sub>2</sub> R1), 43.6 (t, Pip NCH<sub>2</sub> R2), 41.7 (t, Leu CH<sub>2</sub> R2), 41.4 (t, Leu CH<sub>2</sub> R1), 40.3 (t, Gly CH<sub>2</sub> R1), 39.6 (t, Gly CH<sub>2</sub> R2), 32.7 (q, Val NCH<sub>3</sub> R1), 32.7 (t,

ThioPro CHCH<sub>2</sub> R1), 32.1 (t, ThioPro CHCH<sub>2</sub> R2), 29.9 (q, Val NCH<sub>3</sub> R2), 26.5 [d, Val CH(CH<sub>3</sub>)<sub>2</sub> R1], 26.1 [d, Val CH(CH<sub>3</sub>)<sub>2</sub> R2], 25.5 (t, Pip CHCH<sub>2</sub>CH<sub>2</sub> R1), 25.4 (t, Pip CHCH<sub>2</sub>CH<sub>2</sub> R2), 24.9 [d, Leu CH(CH<sub>3</sub>)<sub>2</sub>]\*, 24.8 (t, Pip CHCH<sub>2</sub>)\*, 24.6 (t, ThioPro CH<sub>2</sub>CH<sub>2</sub> R1)\*, 24.4 (t, ThioPro CH<sub>2</sub>CH<sub>2</sub> R2)\*, 23.4 (q, Leu CH<sub>3</sub> R2), 23.0 (q, Leu CH<sub>3</sub> R1), 22.8 (q, Leu CH<sub>3</sub> R2), 22.7 (q, Leu CH<sub>3</sub> R1), 20.7 (q, Thr CH<sub>3</sub> R1), 20.4 (t, Pip NCH<sub>2</sub>CH<sub>2</sub>), 20.1 (q, Val CH<sub>3</sub> R1), 20.0 (q, Val CH<sub>3</sub> R2), 19.9 (q, Ala CH<sub>3</sub> R1), 19.8 (q, Thr CH<sub>3</sub> R2), 19.1 (q, Val CH<sub>3</sub>), 16.8 (q, Ala CH<sub>3</sub> R2).

♦/\*/\* Assignment interchangeable.

**HR-MS (ESI):** [C<sub>38</sub>H<sub>62</sub>N<sub>8</sub>O<sub>12</sub>S+H]<sup>+</sup> calculated: 855.4281; found: 855.4262.

[C<sub>38</sub>H<sub>62</sub>N<sub>8</sub>O<sub>12</sub>S+Na]<sup>+</sup> calculated: 877.4100; found: 877.4081.

<sup>1</sup>H-NMR:

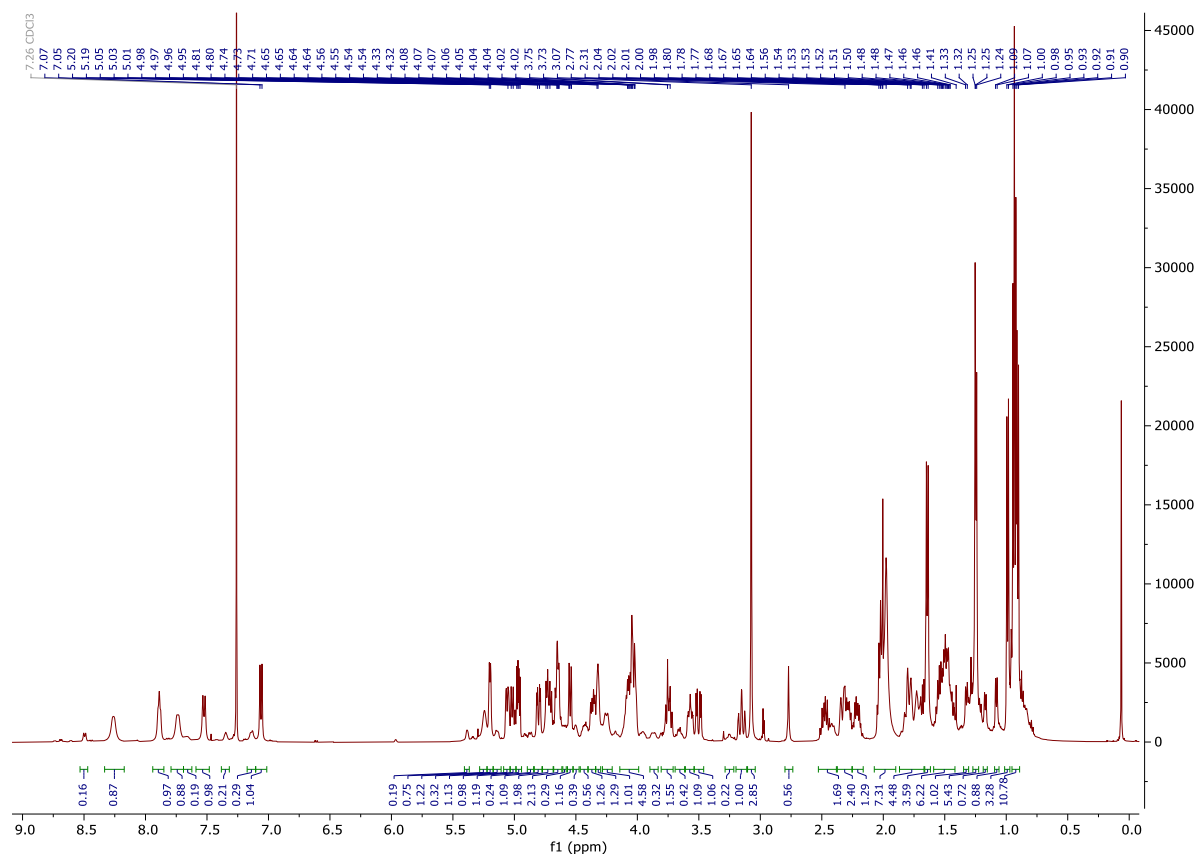

$^{13}\text{C}$ -NMR:

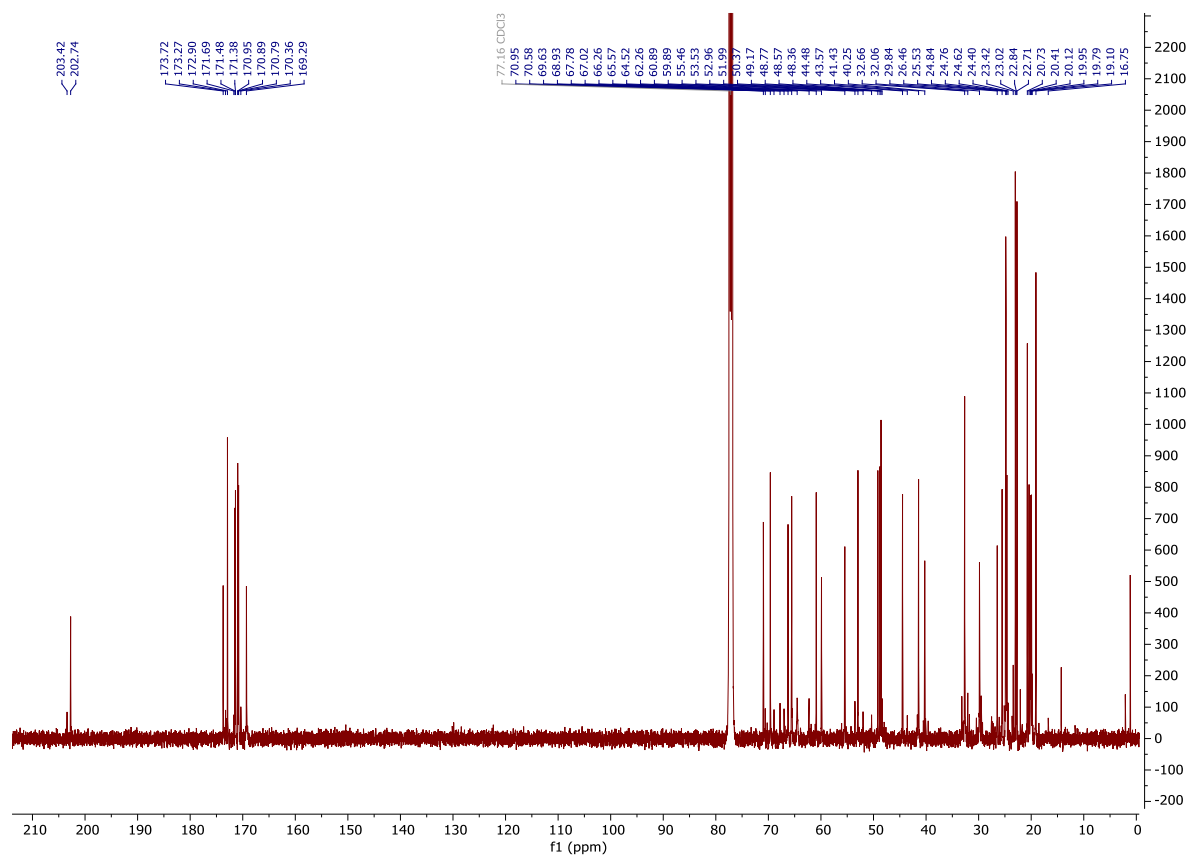

### Gly-Vioprolide B (2)

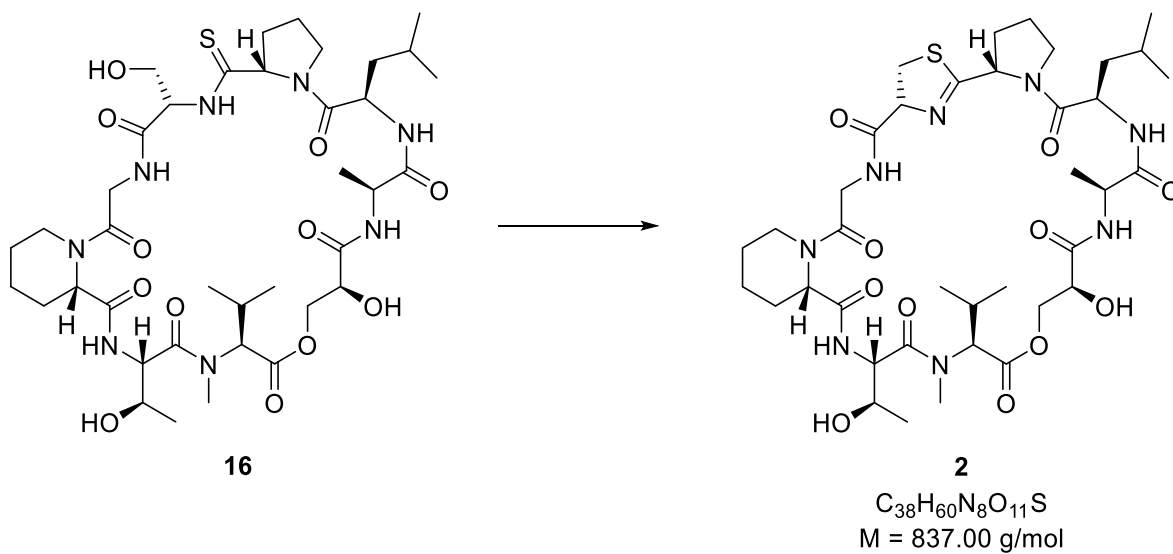

A solution of macrocycle **16** (5.00 mg, 5.85  $\mu\text{mol}$ , 1.00 equiv.) in THF (1 mL) is treated with *Burgess* reagent (8.51 mg, 35.7  $\mu\text{mol}$ , 6.11 equiv.), and the suspension is stirred for two hours at 60 °C. Subsequently, NaCl solution (20 mL) is added to terminate the reaction. The mixture is extracted with EtOAc (3  $\times$  15 mL), and the combined organic phases are dried over Na<sub>2</sub>SO<sub>4</sub> and filtered. The solvent is removed under reduced pressure, yielding approximately 9 mg of a colorless solid, which is still contaminated with starting materials and reagents. This is further purified by semi-preparative HPLC (*Phenomenex* Luna 5u Silica, 20  $\times$  250 mm, *i*PrOH/*n*-Heptane = 30/70, r.t., 15 mL $\cdot$ min<sup>-1</sup>, 215 nm,  $t_R$  (**2**) = 14.9 min, injection concentration: 9 mg $\cdot$ mL<sup>-1</sup>). After lyophilization (using ultra-pure water), Gly Vioprolid B (**2**, 4.06 mg, 4.85  $\mu\text{mol}$ , 83%) is obtained as an amorphous, colorless solid.

**TLC:**  $R_f$  = 0.38 (CH<sub>2</sub>Cl<sub>2</sub>/MeOH = 9/1) [UV, KMnO<sub>4</sub>].

**M.p.:** 159 °C.

**Specific rotation:**  $[\alpha]_D^{RT} = -126.0$  ( $c = 10.0$ , CHCl<sub>3</sub>).

**IR** (ATR):  $\tilde{\nu}$  (cm<sup>-1</sup>) = 3326 (m, OH), 2960 (m, -(CH<sub>2</sub>)-H), 1742 (s, C=O), 1639 (s, C=O), 1520 (s), 1447 (m), 1262 (m), 1124 (m, C=O), 1017 (m), 753 (m).

**Rotamer ratio:** R1/R2  $\approx$  59/41.

**<sup>1</sup>H-NMR** (500 MHz, CDCl<sub>3</sub>, 298 K):  $\delta$  (ppm) = 8.10 (s, 1H, Gly NH R1), 7.92 (s, 1H, Thr NH R2), 7.67 (s, 1H, Ala NH R1), 7.59 (d, <sup>3</sup> $J$  = 9.3 Hz, 1H, Thr NH R1), 7.47 (s, 1H, Gly NH R2), 7.25 (s, 1H, Ala NH R2)\*, 7.16 (s, 1H, Leu NH R2), 7.08 (d, <sup>3</sup> $J$  = 8.5 Hz, 1H, Leu NH R1), 5.41 – 5.37 (m, 1H, Pip CH R2), 5.21 (d, <sup>3</sup> $J$  = 5.5 Hz, 1H, Pip CH R1), 4.94 (q, <sup>3</sup> $J$  = 7.6 Hz, 1H, Ala CH R1), 4.87 (d, <sup>3</sup> $J$  = 8.9 Hz, 1H, Thr CHNH R2), 4.81 – 4.61 (m, 3H, Glc CHH R1, Gly CHH, Leu CH), 4.57 (d, <sup>3</sup> $J$  = 8.9 Hz, 1H, Thr CHNH R1), 4.52 – 4.39 (m, 5H, Glc CHH R2, Ala CH R2, ThioPro CH, Val CH R1, Thz CH R2), 4.36 – 4.25 (m, 3H, Thz CH R1, Pip NCHH R1, Glc CHH R2), 4.25 – 4.17 (m, 1H, Val CH R2), 4.13 – 3.94 (m, 5H, Glc CHH R1, Glc CH, Thr CHOH, Thz CHH, ThioPro NCHH), 3.78 – 3.72 (m, 1H, Pip NCHH R2), 3.69 – 3.62 (m, 2H, ThioPro NCHH R1, Pip NCHH R2), 3.60 – 3.46 (m, 3H, Gly CHH, ThioPro NCHH R2, Pip NCHH R1), 3.19 – 3.11 (m, 1H, Thz CHH), 3.07 (s, 3H, Val NCH<sub>3</sub> R1), 2.78 (s, 3H, Val NCH<sub>3</sub> R2), 2.36 – 2.23 [m, 5H, Val CH(CH<sub>3</sub>)<sub>2</sub>, ThioPro CHCH<sub>2</sub> R2, Pip NCHCH<sub>2</sub>], 2.18 – 1.96 (m, 5H, ThioPro CHCH<sub>2</sub> R1, Pip NCH<sub>2</sub>CHH, ThioPro CHCH<sub>2</sub>CH<sub>2</sub>), 1.86 – 1.65 (m, 3H, Pip NCH<sub>2</sub>CHH, Leu CHHCH(CH<sub>3</sub>)<sub>2</sub>, Pip CHCH<sub>2</sub>CHH), 1.62 (d,

$^3J = 6.9$  Hz, 3H, Ala CH<sub>3</sub> R1), 1.60 – 1.38 (m, 3H, Leu CHHCH(CH<sub>3</sub>)<sub>2</sub>, Pip CHCH<sub>2</sub>CHH), 1.32 (d,  $^3J = 7.1$  Hz, 3H, Ala CH<sub>3</sub> R2), 1.23 (d, 3H,  $^3J = 6.4$  Hz, 3H, Thr CH<sub>3</sub> R1), 1.17 (d,  $^3J = 6.4$  Hz, 3H, Thr CH<sub>3</sub> R2), 1.11 – 1.05 (m, 3H, Val CHCH<sub>3</sub>CH<sub>3</sub> R2), 0.99 (d,  $^3J = 6.5$  Hz, 3H, Val CHCH<sub>3</sub>CH<sub>3</sub> R1), 0.96 – 0.76 [m, 9H, Val CHCH<sub>3</sub>CH<sub>3</sub>, Leu CH(CH<sub>3</sub>)<sub>2</sub>].

\*Signal and residual solvent proton signal overlap.

**<sup>13</sup>C-NMR** (126 MHz, CDCl<sub>3</sub>, 300 K):  $\delta$  (ppm) = 173.8 (s, NCS R1), 173.2 (s, NCS R2), 172.9 (s, Thr CO R2), 172.8 (s, Ala CO R2), 172.8 (s, Thr CO R1), 172.8 (s, Ala CO R1), 172.0 (s, Glc CO R2), 171.4 (s, Glc CO R1), 171.3 (s, Thz CO R1), 171.2 (s, Thz CO R2), 171.1 (s, Leu CO R1)<sup>♦</sup>, 171.0 (s, Val CO R1)<sup>♦</sup>, 170.8 (s, Pip CO R1), 170.8 (s, Gly CO R1), 170.6 (s, Leu CO R2)<sup>♦</sup>, 170.5 (s, Pip CO R2)<sup>♦</sup>, 170.4 (s, Gly CO R2)<sup>♦</sup>, 169.5 (s, Val CO R2), 71.0 (d, Thz CH R1), 70.7 (d, Thz CH R2), 67.8 (d, Thr CHOH R1), 67.1 (d, Thr CHOH R2), 66.9 (t, Glc CH<sub>2</sub> R2), 66.3 (t, Glc CH<sub>2</sub> R1), 65.6 (d, Glc CH R1), 65.5 (d, Glc CH R2), 62.7 (d, ThioPro CH R2), 61.9 (d, ThioPro CH R1), 61.4 (t, Pip NCH<sub>2</sub> R1), 61.3 (t, Pip NCH<sub>2</sub> R2), 55.3 (d, Thr CHNH R1), 54.8 (d, Val NMeCH R1), 53.9 (d, Val NMeCH R2), 53.5 (d, Pip CH R2), 52.8 (d, Pip CH R1), 52.2 (d, Thr CHNH R2), 50.8 (d, Ala CH R2), 49.4 (d, Ala CH R1), 48.4 (Leu CH), 48.1 (t, ThioPro NCH<sub>2</sub> R1), 47.7 (t, ThioPro NCH<sub>2</sub> R2), 44.4 (t, Thz CH<sub>2</sub> R1), 43.6 (t, Thz CH<sub>2</sub> R2), 41.2 (t, Leu CH<sub>2</sub>), 40.3 (t, Gly CH<sub>2</sub> R1), 39.5 (t, Gly CH<sub>2</sub> R2), 39.1 (q, Val NCH<sub>3</sub> R2), 29.8 (t, ThioPro NCHCH<sub>2</sub> R1), 29.4 (q, Val NCH<sub>3</sub> R1), 29.2 (t, ThioPro NCHCH<sub>2</sub> R2), 28.4 [d, Val CH(CH<sub>3</sub>)<sub>2</sub> R2], 26.5 [d, Val CH(CH<sub>3</sub>)<sub>2</sub> R1], 25.7 (t, Pip NCHCH<sub>2</sub> R2), 25.5 (t, Pip NCHCH<sub>2</sub> R1), 25.4 (t, ThioPro NCH<sub>2</sub>CH<sub>2</sub> R2), 25.0 (ThioPro NCH<sub>2</sub>CH<sub>2</sub> R1), 24.9 (t, Pip NCH<sub>2</sub>CH<sub>2</sub>), 24.7 [d, Leu CH(CH<sub>3</sub>)<sub>2</sub>], 23.4 (q, Leu CH<sub>3</sub> R2), 23.1 (q, Leu CH<sub>3</sub> R1), 22.6 (q, Leu CH<sub>3</sub> R1), 22.0 (q, Leu CH<sub>3</sub> R2), 21.3 (q, Val CH<sub>3</sub> R2), 20.6 (q, Thr CH<sub>3</sub> R1), 20.4 (q, Val CH<sub>3</sub> R1), 20.2 (t, Pip CHCH<sub>2</sub>CH<sub>2</sub> R1), 20.2 (q, Thr CH<sub>3</sub> R2), 19.8 (q, Ala CH<sub>3</sub> R1), 19.7 (q, Pip CHCH<sub>2</sub>CH<sub>2</sub> R2), 19.2 (q, Val CH<sub>3</sub> R2), 19.1 (q, Val CH<sub>3</sub> R1), 18.6 (q, Ala CH<sub>3</sub> R2).

♦/\* Assignment interchangeable.

**HR-MS** (ESI): [C<sub>38</sub>H<sub>60</sub>N<sub>8</sub>O<sub>11</sub>S+H]<sup>+</sup> calculated: 837.4175; found: 837.4160.



## 6 Comparison of the NMR spectra

**Table 1:** Comparison of the <sup>1</sup>H-NMR spectra of Vioprolide B (1) and Gly-Vioprolide B (2) with indication of the chemical shift ( $\delta$ ), coupling constants ( $J$ ), and multiplicities (in parentheses).

| (Amino-)acid<br>Proton   | Vioprolide B (1) |          | Gly-Vioprolide B (2) |          |
|--------------------------|------------------|----------|----------------------|----------|
|                          | $\delta$ [ppm]   | $J$ [Hz] | $\delta$ [ppm]       | $J$ [Hz] |
| <b>Ala</b>               |                  |          |                      |          |
| NH                       | 7.08 (d)         | 9.8      | 7.67 (s)             | -        |
|                          | 7.28 – 7.22 (m)  | -        | 7.25 (s)             | -        |
| $\alpha$ -H              | 4.72 – 4.67 (m)  | -        | 4.94 (q)             | 7.6      |
|                          | 4.79 – 4.73 (m)  | -        | 4.52 – 4.39 (m)      | -        |
| $\beta$ -H <sub>3</sub>  | 1.33 (d)         | 7.1      | 1.62 (d)             | 6.9      |
|                          | 1.40 (d)         | 6.8      | 1.32 (d)             | 7.1      |
| <b>Leu</b>               |                  |          |                      |          |
| NH                       | 6.24 (d)         | 9.9      | 7.08 (d)             | 8.5      |
|                          | 6.68 (d)         | 10.0     | 7.16 (s)             | -        |
| $\alpha$ -H              | 4.91 – 4.85 (m)  | -        | 4.81 – 4.61 (m)      | -        |
|                          | 5.03 – 4.91 (m)  | -        | -                    | -        |
| $\beta$ -H <sub>a</sub>  | 1.46 – 1.37 (m)  | -        | 1.86 – 1.65 (m)      | -        |
|                          | 1.30 - 1.19 (m)  | -        | -                    | -        |
| $\beta$ -H <sub>b</sub>  | 1.57 – 1.48 (m)  | -        | 1.60 – 1.38 (m)      | -        |
| $\gamma$ -H              | 1.57 – 1.48 (m)  | -        | 1.60 – 1.38 (m)      | -        |
| $\delta$ -H <sub>3</sub> | 0.98 – 0.80 (m)  | -        | 0.96 – 0.76 (m)      | -        |
| <b>Pro</b>               |                  |          |                      |          |
| $\alpha$ -H              | 4.99 (dd)        | 8.4, 5.0 | 4.52 – 4.39 (m)      | -        |
|                          | 5.11 (dd)        | 8.5, 5.4 | -                    | -        |
| $\beta$ -H <sub>a</sub>  | 2.40 – 2.29 (m)  | -        | 2.36 – 2.23 (m)      | -        |
| $\beta$ -H <sub>b</sub>  | 2.17 – 2.10 (m)  | -        | 2.18 – 1.96 (m)      | -        |
|                          | 2.09 – 1.95 (m)  | -        | -                    | -        |
| $\gamma$ -H <sub>a</sub> | 2.27 – 2.17 (m)  | -        | 2.18 – 1.96 (m)      | -        |
| $\gamma$ -H <sub>b</sub> | 2.09 – 1.95 (m)  | -        | 2.18 – 1.96 (m)      | -        |
| $\delta$ -H <sub>a</sub> | 3.72 – 3.62 (m)  | -        | 3.69 – 3.62 (m)      | -        |
|                          | -                | -        | 3.60 – 3.46 (m)      | -        |
| $\delta$ -H <sub>b</sub> | 3.88 – 3.77 (m)  | -        | 4.13 – 3.94 (m)      | -        |
|                          | 3.56 – 3.53 (m)  | -        | -                    | -        |
| <b>Thz</b>               |                  |          |                      |          |
| $\alpha$ -H              | 5.09 – 5.04 (m)  | -        | 4.36 – 4.25 (m)      | -        |
|                          | -                | -        | 4.52 – 4.39 (m)      | -        |
| $\beta$ -H <sub>a</sub>  | 3.60 – 3.56 (m)  | -        | 4.13 – 3.94 (m)      | -        |
|                          | 3.88 – 3.77 (m)  | -        | -                    | -        |
| $\beta$ -H <sub>b</sub>  | 3.60 – 3.56 (m)  | -        | 3.19 – 3.11 (m)      | -        |
|                          | 3.49 – 3.46 (m)  | -        | -                    | -        |
| <b>Dhb/Gly</b>           |                  |          |                      |          |
| NH                       | 8.77 (s)         | -        | 8.10 (s)             | -        |
|                          | 9.32 (s)         | -        | 7.47 (s)             | -        |

| (Amino-)acid<br>Proton        | Vioprolid B (4)                    |            | Gly-Vioprolid B (96)               |            |
|-------------------------------|------------------------------------|------------|------------------------------------|------------|
|                               | $\delta$ [ppm]                     | $J$ [Hz]   | $\delta$ [ppm]                     | $J$ [Hz]   |
| <b>Pip</b>                    |                                    |            |                                    |            |
| $\alpha$ -H                   | 5.24 (d)<br>5.21 – 5.17 (m)        | 5.2<br>-   | 5.21 (d)<br>5.41 – 5.37 (m)        | 5.5<br>-   |
| $\beta$ -H <sub>a</sub>       | 2.78 – 2.70 (m)<br>3.18 – 3.09 (m) | -<br>-     | 2.36 – 2.23 (m)<br>-               | -<br>-     |
| $\beta$ -H <sub>b</sub>       | 1.57 – 1.48 (m)                    | -          | 2.36 – 2.23 (m)                    | -          |
| $\gamma$ -H <sub>a</sub>      | 1.87 – 1.71 (m)                    | -          | 1.86 – 1.65 (m)                    | -          |
| $\gamma$ -H <sub>b</sub>      | 1.57 – 1.48 (m)                    | -          | 1.60 – 1.38 (m)                    | -          |
| $\delta$ -H <sub>a</sub>      | 1.87 – 1.71 (m)<br>1.72 – 1.66 (m) | -<br>-     | 2.18 – 1.96 (m)<br>-               | -<br>-     |
| $\delta$ -H <sub>b</sub>      | 1.57 – 1.48 (m)                    | -          | 1.86 – 1.65 (m)                    | -          |
| $\varepsilon$ -H <sub>a</sub> | 4.10 – 4.01 (m)<br>-               | -<br>-     | 4.36 – 4.25 (m)<br>3.78 – 3.72 (m) | -<br>-     |
| $\varepsilon$ -H <sub>b</sub> | 3.40 – 3.32 (m)<br>3.18 – 3.09 (m) | -<br>-     | 3.60 – 3.46 (m)<br>3.69 – 3.62 (m) | -<br>-     |
| <b>Thr</b>                    |                                    |            |                                    |            |
| NH                            | 8.35 (d)<br>7.78 (d)               | 9.9<br>7.8 | 7.59 (d)<br>7.92 (s)               | 9.3<br>-   |
| $\alpha$ -H                   | 4.95 (d)<br>4.72 – 4.67 (m)        | 10.1<br>-  | 4.57 (d)<br>4.87 (d)               | 8.9<br>8.9 |
| $\beta$ -H                    | 4.24 – 4.13 (m)                    | -          | 4.13 – 3.94 (m)                    | -          |
| $\gamma$ -H <sub>3</sub>      | 1.17 – 1.11 (m)<br>1.30 – 1.19 (m) | -<br>-     | 1.23 (d)<br>1.17 (d)               | 6.4<br>6.4 |
| <b>Val</b>                    |                                    |            |                                    |            |
| N-CH <sub>3</sub>             | 3.52 (s)<br>2.78 – 2.70 (m)        | -<br>-     | 3.07 (s)<br>2.78 (s)               | -<br>-     |
| $\alpha$ -H                   | 4.28 (d)<br>3.29 – 3.23 (m)        | 10.6<br>-  | 4.52 – 4.39 (m)<br>4.25 – 4.17 (m) | -<br>-     |
| $\beta$ -H                    | 2.60 – 2.51 (m)<br>2.27 – 2.17 (m) | -<br>-     | 2.36 – 2.23 (m)<br>-               | -<br>-     |
| $\gamma$ -H <sub>3</sub>      | 1.17 – 1.11 (m)<br>1.06 (d)        | -<br>6.5   | 0.99 (d)<br>1.11 – 1.05 (m)        | 6.5<br>-   |
| $\gamma$ -H <sub>3</sub>      | 0.98 – 0.80 (m)                    | -          | 0.96 – 0.76 (m)                    | -          |
| <b>Gls</b>                    |                                    |            |                                    |            |
| $\alpha$ -H                   | 4.65 – 4.55 (m)<br>4.41 – 4.36 (m) | -<br>-     | 4.13 – 3.94 (m)<br>-               | -<br>-     |
| $\beta$ -H <sub>a</sub>       | 4.65 – 4.55 (m)<br>4.10 – 4.01 (m) | -<br>-     | 4.13 – 3.94 (m)<br>4.36 – 4.25 (m) | -<br>-     |
| $\beta$ -H <sub>b</sub>       | 4.24 – 4.13 (m)<br>4.81 (d)        | -<br>10.8  | 4.81 – 4.61 (m)<br>4.52 – 4.39 (m) | -<br>-     |



**Table 2:** Comparison of the <sup>13</sup>C-NMR spectra of Vioprolide B (1) and Gly-Vioprolide B (2).

|              |                   | <b>Vioprolide B (1)</b> | <b>Gly-Vioprolide B (2)</b> |
|--------------|-------------------|-------------------------|-----------------------------|
| (Amino-)acid | Carbon atom       | $\delta$ [ppm]          | $\delta$ [ppm]              |
| <b>Ala</b>   | CO                | 171.7                   | 172.8                       |
|              | C- $\alpha$       | 47.6, 47.7              | 49.4, 50.8                  |
|              | C- $\beta$        | 18.0, 19.1              | 19.8, 18.6                  |
| <b>Leu</b>   | CO                | 171.5, 171.2            | 171.1, 170.6                |
|              | C- $\alpha$       | 49.1, 48.9              | 48.4                        |
|              | C- $\beta$        | 40.0, 40.2              | 41.2                        |
|              | C- $\gamma$       | 24.7, 24.4              | 24.7                        |
|              | C- $\delta$       | 22.9, 22.8              | 23.4, 23.1                  |
|              | C- $\delta'$      | 22.6, 22.5              | 22.6, 22.0                  |
| <b>Pro</b>   | CO                | 180.5, 181.1            | 173.8, 173.2                |
|              | C- $\alpha$       | 60.2                    | 61.9, 62.7                  |
|              | C- $\beta$        | 30.4, 29.5              | 29.8, 29.2                  |
|              | C- $\gamma$       | 25.3, 25.5              | 25.0, 25.4                  |
|              | C- $\delta$       | 47.7, 48.0              | 48.1, 47.7                  |
| <b>Thz</b>   | CO                | 169.5, 171.2            | 171.3, 171.2                |
|              | C- $\alpha$       | 77.8, 76.8              | 71.0, 70.7                  |
|              | C- $\beta$        | 36.5, 37.8              | 44.4, 43.6                  |
| <b>Pip</b>   | CO                | 169.2, 170.2            | 170.8, 170.5                |
|              | C- $\alpha$       | 53.9, 53.1              | 52.8, 53.5                  |
|              | C- $\beta$        | 26.7, 26.1              | 25.5, 25.7                  |
|              | C- $\gamma$       | 21.1, 21.2              | 20.2, 19.7                  |
|              | C- $\delta$       | 25.6, 25.5              | 24.9                        |
|              | C- $\epsilon$     | 46.2, 46.3              | 61.4, 61.3                  |
| <b>Thr</b>   | CO                | 172.9, 172.4            | 172.8, 172.9                |
|              | C- $\alpha$       | 51.8, 56.2              | 55.3, 52.2                  |
|              | C- $\beta$        | 68.0, 66.8              | 67.8, 67.1                  |
|              | C- $\gamma$       | 19.7, 20.1              | 20.6, 20.2                  |
| <b>Val</b>   | CO                | 169.6, 169.3            | 171.0, 169.5                |
|              | N-CH <sub>3</sub> | 29.7, 40.7              | 29.4, 39.1                  |
|              | C- $\alpha$       | 65.4, 70.1              | 54.8, 53.9                  |
|              | C- $\beta$        | 27.7, 29.0              | 26.5, 28.4                  |
|              | C- $\gamma$       | 21.7, 19.6              | 20.4, 21.3                  |
|              | C- $\gamma'$      | 19.7, 19.4              | 19.1, 19.2                  |
| <b>Gls</b>   | CO                | 171.4, 170.8            | 171.4, 172.0                |
|              | C- $\alpha$       | 69.5, 71.7              | 65.6, 65.5                  |
|              | C- $\beta$        | 65.7, 66.3              | 66.3, 66.9                  |

## **7 Data Availability**

Proteomics data have been deposited to the ProteomeXchange Consortium via the PRIDE<sup>15</sup> partner repository and can be accessed using the identifier PXD053104 (reviewer account username reviewer\_pxd053104@ebi.ac.uk, password SNidZt2JyMry).

The primary data of the NMR spectra have been deposited to Zenodo and can be accessed using the DOI: 10.5281/zenodo.11576894

## 8 References

1. K. M. Backus, B. E. Correia, K. M. Lum, S. Forli, B. D. Horning, G. E. González-Páez, S. Chatterjee, B. R. Lanning, J. R. Teijaro, A. J. Olson, D. W. Wolan and B. F. Cravatt, *Nature*, 2016, **534**, 570-574.
2. P. R. A. Zanon, L. Lewald and S. M. Hacker, *Angew. Chem. Int. Ed.*, 2020, **59**, 2829-2836.
3. D. Kessner, M. Chambers, R. Burke, D. Agus and P. Mallick, *Bioinformatics*, 2008, **24**, 2534-2536.
4. A. T. Kong, F. V. Leprevost, D. M. Avtonomov, D. Mellacheruvu and A. I. Nesvizhskii, *Nat. Methods*, 2017, **14**, 513-520.
5. F. Yu, G. C. Teo, A. T. Kong, S. E. Haynes, D. M. Avtonomov, D. J. Geiszler and A. I. Nesvizhskii, *Nat. Commun.*, 2020, **11**, 4065.
6. H. Y. Chang, A. T. Kong, F. da Veiga Leprevost, D. M. Avtonomov, S. E. Haynes and A. I. Nesvizhskii, *J. Proteome Res.*, 2020, **19**, 2511-2515.
7. D. J. Geiszler, A. T. Kong, D. M. Avtonomov, F. Yu, F. D. V. Leprevost and A. I. Nesvizhskii, *Mol. Cell. Proteom.*, 2021, **20**, 100018.
8. A. Keller, A. I. Nesvizhskii, E. Kolker and R. Aebersold, *Anal. Chem.*, 2002, **74**, 5383-5392.
9. A. I. Nesvizhskii, A. Keller, E. Kolker and R. Aebersold, *Anal. Chem.*, 2003, **75**, 4646-4658.
10. G. C. Teo, D. A. Polasky, F. Yu and A. I. Nesvizhskii, *J. Proteome Res.*, 2021, **20**, 498-505.
11. F. da Veiga Leprevost, S. E. Haynes, D. M. Avtonomov, H. Y. Chang, A. K. Shanmugam, D. Mellacheruvu, A. T. Kong and A. I. Nesvizhskii, *Nat Methods*, 2020, **17**, 869-870.
12. F. Yu, S. E. Haynes, G. C. Teo, D. M. Avtonomov, D. A. Polasky and A. I. Nesvizhskii, *Mol. Cell. Proteom.*, 2020, **19**, 1575-1585.
13. *Nucleic Acids Res*, 2019, **47**, D506-d515.
14. S. Tyanova, T. Temu, P. Sinitcyn, A. Carlson, M. Y. Hein, T. Geiger, M. Mann and J. Cox, *Nat. Methods*, 2016, **13**, 731-740.
15. Y. Perez-Riverol, J. Bai, C. Bandla, D. García-Seisdedos, S. Hewapathirana, S. Kamatchinathan, J. Kundu, Deepti A. Prakash, A. Frericks-Zipper, M. Eisenacher, M. Walzer, S. Wang, A. Brazma, J. A. Vizcaino, *Nucleic Acids Res.* 2021, **50**, D543-D552.
